# Temporal scaling of ageing as an adaptive strategy of *Escherichia coli*

Yifan Yang<sup>1,2,\*</sup>, Ana L. Santos<sup>1</sup>, Luping Xu<sup>1,2,3</sup>, Chantal Lotton<sup>1</sup>, François Taddei<sup>1,2</sup>

and Ariel B. Lindner<sup>1,2,\*</sup>

<sup>1</sup> INSERM U1001, Faculté de Médecine, Université Paris Descartes, Paris, France

<sup>2</sup> Center for Research and Interdisciplinarity, Paris, France

<sup>3</sup> Current address: Center for Nano and Micro Mechanics, School of Aerospace Engineering, Tsinghua University, Beijing, China

\* Correspondence: [yifan.yang@inserm.fr](mailto:yifan.yang@inserm.fr) and [ariel.lindner@inserm.fr](mailto:ariel.lindner@inserm.fr)

## Abstract

Natural selection has long been hypothesised to shape ageing patterns, but whether and how ageing contributes to life-history evolution remains elusive. The complexity of various ageing-associated molecular mechanisms and their inherent stochasticity hinder reductionist approaches to the understanding of functional senescence, *i.e.* reduced fecundity and increased mortality. Recent bio-demographic work demonstrated that high-precision statistics of life-history traits such as mortality rates could be used phenomenologically to understand the ageing process. We adopted this approach to study cellular senescence in growth-arrested *E. coli* cells, where damages to functional macromolecules are no longer diluted by fast *de novo* biosynthesis. We acquired high-quality longitudinal physiological and life history data of large environmentally controlled clonal *E. coli* populations at single-cell resolution, using custom-designed microfluidic devices coupled to time-lapse microscopy. We show that *E. coli* lifespan distributions follow the Gompertz law of mortality, a century-old actuarial observation of human populations, despite developmental, cellular and genetic differences between bacteria and metazoan organisms. Measuring the shape of the hazard functions allowed us to disentangle quantitatively the demographic effects of ageing, which accumulate with time, from age-independent genetic longevity-modulating interventions. A

27 pathway controlling cellular maintenance, the general stress response, not only promotes  
28 longevity but also temporally scales the whole distribution by reducing ageing rate. We  
29 further show that *E. coli*, constrained by the amount of total biosynthesis, adapt to their  
30 natural feast-or-famine lifestyle by modulating the amount of maintenance investment,  
31 rendering ageing rate a highly evolvable life-history trait.

32

### 33 **Background**

34 The biology of ageing and senescence is centred on the duality of individual frailty  
35 and population resiliency. Throughout the course of normal metabolism, components of  
36 living systems such as cells, lipids, proteins and DNA inevitably suffer from wear-and-tear  
37 such as free-radical damages. This constant and collective decay eventually leads to the loss  
38 of vital functions and collapse of individuals. Understanding the way that system failure  
39 emerges out of distributed microscopic damages could reveal how functional components are  
40 organised into self-maintaining individuals in the first place<sup>1,2</sup>. Yet for some organisms in the  
41 tree of life, ageing does not lead to increased mortality and declined fertility<sup>3</sup>. Organisms  
42 possess the abilities to repair or replace most of the damages to their components,  
43 exemplified by the "immortal germ line"<sup>4</sup>. Evolutionary biologists attribute the apparent  
44 senescence of metazoan somas to the inadequate investment in cellular maintenance as an  
45 adaptive strategy to maximise lifetime reproductive success, due to the trade-offs between the  
46 survival and reproduction of the young on one hand, and maintenance for the benefit of the  
47 old on the other<sup>5,6</sup>. Presumably, natural selection has to operate through the molecular  
48 "levers" of damage accumulation and/or repair to achieve such life-history optimisation.

49 *Escherichia coli*, a single-cell prokaryote with short lifespans, has historically served  
50 as a model organism that resolved many fundamental questions in biology. *E.coli* cells, as  
51 their metazoan counterparts, suffer from damages to their components, which lead to cellular

52 senescence<sup>7,8</sup>. In exponential growth, these damages are quickly diluted by *de novo*  
53 biosynthesis, and the effects of cellular senescence mitigated by rapid and robust  
54 reproduction<sup>9</sup>. Yet, the natural life cycle of *E.coli* entails a much wider range of physiological  
55 conditions than exponential growth. Most of bacterial cells spend much of their lives in  
56 resource-limited growth arrested conditions, where *de novo* biosynthesis rates are slower<sup>10</sup>  
57 and cells undergo senescence due to the accumulation of molecular damages such as protein  
58 misfolding and oxidation (Fig. 1)<sup>11</sup>. Despite the lack of fixed separation of germ and soma  
59 cells, the ability to survive the wear and tear of cellular components during growth arrests  
60 contribute to bacterial overall fitness as much as the ability for exponential growth. We,  
61 therefore, adopted a bio-demographic approach<sup>1,2</sup> to understand how modulation of molecular  
62 damage repair could shape ageing dynamics in growth-arrested *E.coli*.

63

## 64 **Custom-designed microfluidic devices allow longitudinal tracking of vitality at** 65 **single-cell level**

66 We first set out to acquire high quality longitudinal physiological and life-history data  
67 at single-cell resolution of clonal populations of *E.coli*. For decades, limitations of traditional  
68 cell culture methods have frustrated quantitative physiologists' attempts to understand  
69 bacterial maintenance<sup>12,13</sup>, due to both media-cell interactions and cellular interaction such as  
70 cross-feeding and cannibalism. To be able to measure individual *E.coli* cell lifespan in  
71 constant and homogenous environmental settings, we designed a novel microfluidic device  
72 with cell-dimension chambers (Fig. 2). Cells are trapped in an array of single-cell-wide  
73 dead-ended wells, with openings to a main flow channel. Constant flow of fresh media in this  
74 main channel provides necessary nutrients and eliminates metabolic waste, cell debris and  
75 intercellular crosstalk so that the environmental conditions are maintained constant over time.  
76 Cells with appropriately expressed fluorescent markers are imaged bottom-up and appear as

77 fluorescent spots (Fig. 2b). This experimental system allows easy tracking of cohorts of a  
78 large number of individual bacterial cells for prolonged periods (up to 7 days).

79 In order to observe cell mortality, we included in the carbon-source-free medium a  
80 red-fluorescent, DNA-binding, bacterial viability dye, Propidium Iodide (P.I.), which  
81 penetrates the cells only when cellular membrane potentials are disrupted. P.I. staining has  
82 been established as an effective proxy of cellular death and correlates well with cell viability  
83 assessed by proliferating potential<sup>14</sup>. We used P.I. at a concentration 4-fold lower than the  
84 previous concentration that had no effects on *E.coli* viability and growth<sup>14</sup>. Automatic time-  
85 lapse fluorescence microscopy and fixed geometry of our devices allowed longitudinal  
86 quantification of P.I. signal for every single cell in the population. We defined the half point  
87 between peak P.I. signal and background fluorescence as a threshold to establish the time-of-  
88 death. At the end of the experiments, 70% ethanol was injected into the device in order to  
89 account for every cell in the cohort, and establish a lower bound for the time-of-death of  
90 surviving cells. These cells were censored at the time that their P.I. signals crossed their  
91 respective thresholds (see Methods).

92 Despite being genetically clonal and environmentally controlled, cells did not share  
93 the same time or manner of death, as measured by the P.I. time-series. The transition from  
94 life to death of a representative cohort (N= 4744) could be visualised by the boundary  
95 between dark to light in Fig. 2d. Because cells were sorted vertically according to estimated  
96 lifespans, the shape of this boundary represents the survival function of the population.  
97 Considering ageing and death as a stochastic process of system reliability reduction<sup>1,2</sup>, the  
98 observed time-of-death distribution could be viewed as the population's first-passage time  
99 distribution. In addition, we observed individual differences in death trajectories. Short-lived  
100 cells tended to have very sharp P.I. increases that associated with abrupt losses of membrane

101 integrity; while those that die late tended to suffer a type of "slow death" characterised by a  
102 gradual P.I. increase over the course of 10-15 hours.

103

#### 104 ***E. coli* lifespan distributions follow the Gompertz law**

105 For both demographers and reliability engineers, the age-associated increase in death  
106 probability, also known as the hazard rate  $h(t)$ , is considered to be a hallmark of ageing<sup>1-3</sup>.  
107 The detailed population statistics derived from our experiments are particularly useful in  
108 estimating the shape of the hazard functions over the whole lifespan. We find that *E.coli*  
109 lifespan distributions have, as their main feature, regimes with exponentially increasing  
110 hazard rates, *i.e.* the Gompertz law of mortality  $h(t) \sim h(t_0) e^{b(t-t_0)}$ , where  $h(t_0)$  is the initial  
111 hazard rate and  $b$  is the Gompertz ageing rate<sup>15,16</sup>. We estimated  $h(t)$  directly with binomial  
112 error by binning mortality events within discrete time intervals  $(\tau_i, \tau_{i+1})$ , *i.e.*  $\tilde{h}_i \sim d_i/Y_i/\Delta\tau_i$ ,  
113 where  $Y_i$  is the number of individuals at risk at time  $\tau_i$  and  $d_i$  is the number of cell deaths  
114 within  $(\tau_i, \tau_{i+1})$  (see Fig. 3). For wildtype cells, this exponential regime spans from about 13  
115 hours to 93 hours, corresponding to approximately 90% of all cell deaths ( $N_{\text{total}}=4744$ , see  
116 Fig. 3b, top x-axis), and ranges at least 100-fold changes in hazard rates ( $2 \cdot 10^{-3} \text{ h}^{-1}$  to  $2 \cdot 10^{-1}$   
117  $\text{h}^{-1}$ ). Within this exponential regime, the doubling time of hazard rate is  $9.4 \pm 0.5$  hours. In  
118 comparison, the doubling time of human mortality hazards is about 8 years<sup>15</sup>.

119 Hazard rates not only define lifespan distributions but can also be thought of as  
120 surrogates for system vulnerability, whose dynamics through time reflect the physiological  
121 consequence of ageing. In this light, the Gompertz law can be interpreted as a dynamic  
122 equation governing the ageing process:  $dh(t)/dt = bh(t)$ , where  $b$  is the Gompertz ageing rate.

123 The integral version,  $h(t) = bH(t) + h(t_0)$ , where  $H(t) = \int_0^t h(t') dt'$ , can be directly observed in

124 the phase plane of the cumulative hazards  $H(t)$  without any free parameters (Fig. 3b). The

125 integral equation is used because  $H(t)$  can be estimated independent of binning, by using the  
126 Nelson-Aalen (N-A) estimator  $\tilde{H}_{NA}(\tau_i)^{17}$ . The fact that the theoretical trajectory, including  
127 the aforementioned linear regime, lies within the confidence intervals (CI) of almost every  
128 state coordinate  $(\tilde{H}_{NA}(\tau_i), \tilde{h}_i)$  lends strong statistical credence to the Gompertz law for  
129 describing our data. In addition, the observed trajectory in the phase plane links the  
130 instantaneous hazard rate  $h(t)$  at any given time  $t$ , with the total proportion of population that  
131 have died before time  $t$  (because  $H(t) = -\ln[S(t)]$ , where  $S(t)$  is the survival function).

132 The hazard rate observed deviates from the exponential regime at the beginning ( $t < 15$   
133 hours, 3% cell deaths) and the end ( $t > 93$  hours, 7% cell deaths) of the total lifespan. These  
134 observations are reminiscent of similar deviations from Gompertz law in human mortality  
135 data<sup>18,19</sup>. In our case, the additional mortality at the early age might result from harvesting  
136 and transferring exponentially growing cells from batch culture directly to growth-arresting  
137 conditions inside our microfluidic chip, in a way analogous to infant mortality in human  
138 mortality data, which can be modelled by an age-independent component ( $\lambda$  in the Gompertz-  
139 Makeham model  $h_{gm}(t) = \lambda + \frac{b}{\beta} e^{bt}$ , where  $\beta$  controls the age at which the Gompertz regime  
140 overtakes the Makeham term  $\lambda$ ).

141 Late-life hazard decelerations are common phenomena for both model organisms and  
142 human populations<sup>18,20</sup>. It is thought that these hazard decelerations often do not reflect  
143 ageing decelerations for individuals, but result from changes in composition of heterogeneous  
144 populations. The more fragile individuals are more likely to die and be removed from the  
145 cohort. When hazard rates are high late in life, significant portions of the populations are  
146 removed so that the observed hazard rates of the surviving populations would be smaller than  
147 the original cohorts on average. We found that an extension to the Gompertz law named  
148 Gamma-Gompertz, originally used to model old-age human model data<sup>21</sup>, could also

149 satisfactorily model late life decelerations in our data, for both wildtype and mutant strains  
150 (see below). It could be understood as accounting for the compositional changes by an  
151 additional parameter,  $s$ , controlling the level of frailty heterogeneity:

152  $h_{gg}(t) = \frac{b}{\beta} e^{bt} \cdot s [S_{gg}(t)]^{1/s}$ , where  $S_{gg}(t)$  is the survival function of Gamma-Gompertz, and

153 other parameters are as before. Despite being genetically and environmentally non-  
154 distinguishable, we think it is reasonable to assume frailty heterogeneity exist in our single-  
155 cell populations due to the stochastic nature of cellular biochemistry, explaining the  
156 suitability of the Gamma-Gompertz for our data.

157 We thus used the Gamma-Gompertz-Makeham (GGM) extension model with 4  
158 parameters to fully model our data across the whole lifespan, with parameters estimated by  
159 likelihood maximisation:

160 
$$h_{ggm}(t) = \lambda + \frac{bs}{1 + (\beta - 1)e^{-bt}}$$

161 Goodness-of-fit was evaluated using a one-sample Kolmogorov-Smirnov test for  
162 right-censored survival time data. The appropriateness of the model terms was evaluated by  
163 comparing Akaike Information Criterion (AIC) of the candidate models (see methods).

164

## 165 **The general stress response of *E. coli* modulates the ageing rate**

166 Evolutionary theories of ageing predict the existence of ageing-modulating  
167 mechanisms and their activation by nutrient limitation<sup>22</sup>. Several nutrient-sensing pathways in  
168 both bacteria and metazoans have been shown to control stress resistance and reduce  
169 mortality<sup>23-25</sup>. Yet their roles in delaying ageing-related damage accumulations are often  
170 controversial. It is often difficult and requires large experimental cohorts to disentangle their  
171 effects on ageing from age-independent components of longevity<sup>26</sup>. Having established a  
172 method to measure ageing rates using high-quality mortality statistics, we harnessed this

173 system to shed light on potential ageing-modulating mechanisms of *E.coli* that might be  
174 activated in response to nutrient deprivation.

175 Many bacteria species regulate the level of cellular maintenance through a genetic  
176 pathway called general stress response (GSR), controlled by the master transcriptional  
177 regulator *rpoS* that is activated by nutrient-deprivation among other signals<sup>27</sup> (Fig. 4a). To  
178 assess the role of *rpoS*-controlled cellular maintenance in the ageing of growth-arrested  
179 *E.coli*, we measured the lifespan distributions of two GSR mutants,  $\Delta rpoS$ , and  $\Delta rssB$  with  
180 that of the wildtype strain.  $\Delta rpoS$  is the null mutant and  $\Delta rssB$  displays an elevated GSR due  
181 to increased RpoS stability<sup>28</sup>. We observed that higher GSR promotes longevity in the  
182 microfluidic experiments, whereas the absence of GSR results in shortened longevity (Fig. 4b  
183 and Fig. 5a). Our large sample sizes allowed us to directly measure the hazard dynamics (Fig.  
184 4c) of each strain, which could disentangle GSR's effects on ageing rate, as opposed to age-  
185 independent components of longevity.

186 Significantly, we found that increased GSR reduces the rate of ageing (Fig. 4d and  
187 Fig. 5c). Given how well the GGM model fitted for all 3 strains, the impact of genotypes on  
188 ageing parameters such as ageing rates could be extracted using generalised linear models  
189 (GLM). With enhanced GSR,  $\Delta rssB$  cells double their mortality risk every 14.1 hours, with a  
190 95% CI ranging from 13.1 to 15.3 hours, compared to 9.4 hours for the wildtype (CI 8.9 - 9.9  
191 hours) and 7.3 hours for the null strain  $\Delta rpoS$  (CI 6.8 to 7.7 hours). Variability of ageing rate  
192 measurements was assessed using 3 independent experimental cohorts for each strain (Figure  
193 S1). We visualised non-parametrically the overall experimental variations (Fig. 5a and b).  
194 Parametric differences in ageing rates among experimental repeats were tested using GLM  
195 models and AIC. We confirmed that experimental repeats shared similar ageing rates ( $H_0$ :  
196 Same aging rate for experimental repeats. d.f.  $H_0 - H_1 = -2$ ;  $\Delta AIC_{rssB} = -2.56$ ,  $\Delta AIC_{wt} = -2.26$ ,  
197  $\Delta AIC_{rpoS} = -2.30$ ;  $N_{wt} = 6867$ ,  $N_{rssB} = 6969$ ,  $N_{rpoS} = 4793$ ).



198 The systematic increase in vulnerability of *E. coli* in our experiments is likely driven  
199 by the catabolism of pre-existing macromolecules and dissimilation of biomass<sup>29,30</sup>, which is  
200 necessary to provide energy to express housekeeping genes and maintain physiological  
201 homeostasis<sup>10,31</sup>. Our finding that GSR modulates ageing rate suggests that optimising this  
202 maintenance energy requirement is likely one of the physiological functions of the RpoS  
203 regulon (see Discussion).

204

### 205 **Evolutionary trade-offs mediated by the general stress response**

206 Is slower ageing an adaptive life-history trait? This was one of original question  
207 raised by Sir Peter Medawar<sup>32</sup> that motivated much of later ageing research. Optimal life-  
208 history theory suggested that trade-offs and constraints among fitness components shape  
209 metazoan ageing rates<sup>6</sup>. The possibility of modulating ageing rate through GSR offers us the  
210 opportunity to test these ideas in a fast-evolving organism as *E. coli*.

211 The relatively well-understood GSR pathway provides a clear molecular mechanism  
212 for a trade-off between growth and maintenance. The master regulator *rpoS* encodes the RNA  
213 polymerase (RNAP) sigma subunit  $\sigma^S$ , which competes with the other sigma factors  
214 including the vegetative  $\sigma^D$  to recruit the core RNAP and direct the transcription and  
215 translation machinery towards the RpoS regulon. By titrating protein synthesis activity away  
216 from metabolic and ribosomal genes controlled by  $\sigma^D$ , RpoS activity inhibits growth and  
217 nutrient assimilation<sup>33</sup>. We measured quantitatively the growth impact of modulating GSR  
218 levels, and modelled its effect using a simple course-grained model of proteome sectors<sup>34</sup>.  
219 We found that the proportion of protein synthesis devoted to the RpoS regulon linearly  
220 increases the timescale of growth (see top axis in Fig. 6a).

221 To assess the life-history optimality of different ageing rates, we integrated  
222 numerically the experimentally derived growth rates and mortality rates into fitness, defined

223 as the long-term population growth rates. In contrast to metazoans, for whom fertility and  
224 mortality schedules are connected through fixed age structures, our model of *E. coli* life-  
225 history consisted of alternating environmental episodes of varying durations, in which *E. coli*  
226 populations either grow ("feast"), or decline ("famine") (Fig. 6a). These feast-or-famine  
227 cycles were parameterised by two transition rates, controlling respectively the average  
228 lengths of "feast" and "famine" episodes. In order to identify selective pressure for ageing  
229 rates, we directly compared the fitness of the three strains with different GSR phenotypes,  
230 each representing a different strategic position in the growth-maintenance trade-off. We  
231 identified the environmental regimes selecting for faster or slower ageing (Fig. 6b). The  
232 boundaries between these regimes were characterised along two axes: lifestyle ratio, defined  
233 as the ratio of time spent in "famine" versus "feast"; and "famine" mean residence time, or in  
234 other words, average length of "famine" episodes.

235         There are two necessary conditions for selecting slower ageing strategies represented  
236 by  $\Delta rssB$ . First, populations have to spend much more time in "famine" rather than "feast", so  
237 that over the long term, population decline rather than grow. Secondly but no less important,  
238 given the same lifestyle ratio, famines should consist of longer episodes rather than short but  
239 more frequent ones. This condition is necessary due to the exponential mortality dynamics  
240 described by Gompertz law: investing in cellular maintenance only becomes beneficial at old  
241 age, when the exponentially increasing benefits of slower ageing eventually overcome the  
242 more immediate cost on growth. It is the typical timescale of "famine" that provides the  
243 selective pressure for ageing rates.

244         Despite representing the complex regulations of GSR with two mutants, we can now  
245 understand the ecological role of GSR activation and its adaptive consequences. Activated by  
246 declining nutrient availability, GSR directs resources towards internal maintenance to wait  
247 out the adverse conditions, whose lengths determine the optimal activation level. Previous

248 observations from experimental evolution of *E. coli* support our predictions. In continuous  
249 cultures of *E. coli* where the populations do not pass through prolonged growth-arresting  
250 bottlenecks, mutations that attenuate or knock out RpoS activity are among the first to  
251 arise<sup>35,36</sup>. In contrast to the isolated populations under constant environmental conditions in  
252 our chip experiments, *E. coli* populations in nature influence their environments, and also  
253 interact with each other. These interactions may give rise to frequency-dependent selection  
254 and evolutionary game dynamics between slower and faster ageing strategies, as is observed  
255 in experimental evolution<sup>37,38</sup>.

256

## 257 **Discussion**

258 We obtained high quality single-cell demographic data, using a novel microfluidic  
259 device, to demonstrate that ageing of growth-arrested *E. coli* follows the Gompertz law of  
260 mortality. Moreover, bacterial general stress response could temporally rescale the lifespan  
261 distribution by modulating the ageing rate. We further articulated in a demographic model the  
262 trade-offs and selective pressure driving the evolution of ageing rate.

263 In our work, two different conceptual perspectives of ageing are integrated and  
264 applied to one of the most iconic model organism, *E. coli*. One perspective, held by  
265 biochemists and physicists, sees ageing as the stochastic and inevitable erosion of organismal  
266 order and biochemical redundancy, created by self-reproducing and self-maintaining  
267 networks during growth and development. The other perspective, from evolutionary biology,  
268 views ageing as a component of the organismal life-history strategy, optimised and fine-tuned  
269 by natural selection. These two approaches constitute the proximate and ultimate causes of  
270 ageing respectively, with the former providing the constraints and the "lever" for the latter. In  
271 bacteria, we indeed observed the stochastic process of ageing and mortality. Lifespan vary  
272 significantly among genetically identical individuals in constant, homogeneous environment.

273 However, at the population level, ageing is characterised qualitatively by the Gompertz law  
274 of mortality. In response to environmental conditions, the lifespan distribution is modulated  
275 by regulatory and selective forces through temporal scaling, while its general, exponential,  
276 shape is preserved. These new empirical observations provided an integrated perspectives to  
277 bacterial ageing, and by extension, potentially to the breath of the tree of life.

278 Although the Gompertz law has been shown to characterise ageing of many metazoan  
279 organisms, the physiological correlates of its parameters are not well understood. To rescale  
280 the lifespan distribution without changing the general shape of hazard dynamics, GSR has to  
281 orchestrate a coordinated response to manage various molecular damages that the organism  
282 encounters<sup>1</sup>. Indeed, RpoS regulates hundreds of genes conferring resistance to both internal  
283 and external stresses such as oxidative, thermal, acid, alkaline, osmotic, and UV<sup>39</sup>. For this  
284 reason, the ageing rate in our case reflects the general level of macromolecular catabolism  
285 and may relate to the maintenance energy of bacteria<sup>13</sup>. We hypothesise that the energetic  
286 costs of homeostasis and molecular damage repair are paid by the loss of biomass, leading to  
287 the gradual increase in the probability of death. It is the rate of energy dissipation, or the rate  
288 of living, that correlates with the ageing rate in our system (see Fig. 7).

289 Despite the simplicity of bacteria and its vast differences from animals, we find that  
290 concepts in evolutionary theories of ageing, such as antagonistic pleiotropy<sup>5</sup>, still apply.  
291 RpoS mediates trade-offs between growth and maintenance, between assimilation of nutrients  
292 and dissimilation of biomass. Sigma competition, a well-understood mechanism in the  
293 physiology of bacterial stress response, provides a molecular basis for such trade-offs often  
294 only hypothesised in metazoan organisms. Activated by nutritional deprivation and shown to  
295 decrease the ageing rate, GSR has immediate analogies in calorie-restriction-induced  
296 longevity of metazoan model organisms. Whereas in many studies on animal models, calorie-  
297 restriction-related pathways have only been shown to promote longevity, our demographic

298 data allow us to show that GSR indeed changes the rate of ageing. It can be thought of as not  
299 only providing resistance against stress, but also insurance against prolonged growth arrests,  
300 or in other words, protection against the progression of time.

301 In the future, the experimental approach and statistical framework described here  
302 could combine with classical genetic methods to examine further ways hazard dynamics  
303 could be perturbed, and to reveal dynamic features of the complex network shaping cellular  
304 senescence under various environmental constraints. Future modelling efforts should clarify  
305 how adaptive processes could optimise redundancy of living systems, in trade-offs with other  
306 traits, to produce the Gompertz law.

### 307 **Acknowledgements**

308 This study was supported by the Axa Research Fund Chair on Longevity. We thank  
309 X. Song for contributions on image analysis, D. Misevic and other member of INSERM  
310 U1001 for their advice and discussions.

### 311 **Author contributions**

312 Conceived and designed project: Y.Y., L.X., F.T., A.B.L.; Conceived and designed  
313 experiments: Y.Y., A.B.L.; performed experiments: Y.Y. A.S. C.L.; Data analysis: Y.Y.,  
314 Wrote the paper: Y.Y. with contribution from A.B.L. .

315

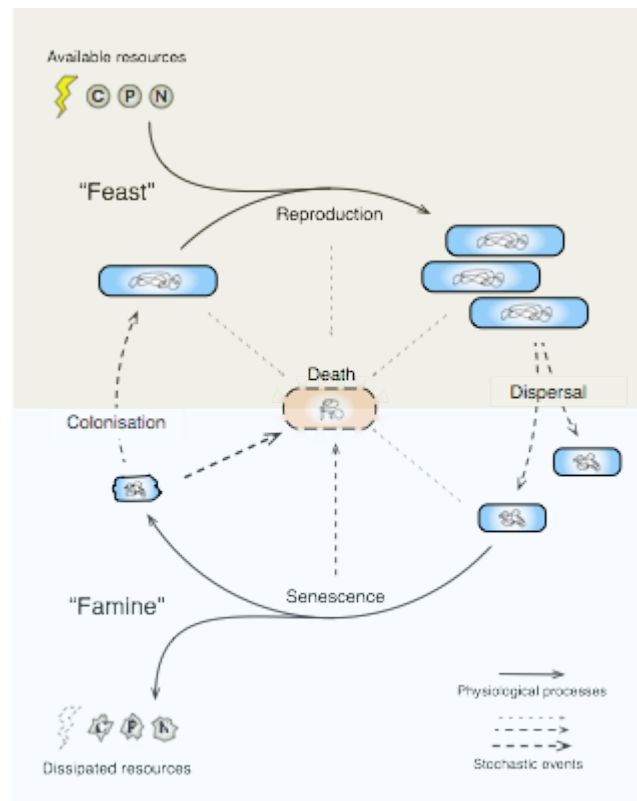

316

317 **Figure 1.** The feast-and-famine life cycle of *E. coli*. Single-cell organisms such as *E. coli*  
318 undergo developmental transitions not in response to fixed developmental programs but  
319 opportunistically in response to environmental changes. Because long-term growth rates in a  
320 stable ecosystem remain close to zero, life-history traits in "feast" and "famine" conditions  
321 should contribute rather equally to overall fitness. In "feast" conditions, the traits under  
322 strong selection are resource assimilation and reproduction, while in "famine" conditions are  
323 maintenance and survival. Senescence has been shown to occur in "famine" conditions<sup>11</sup>.

324

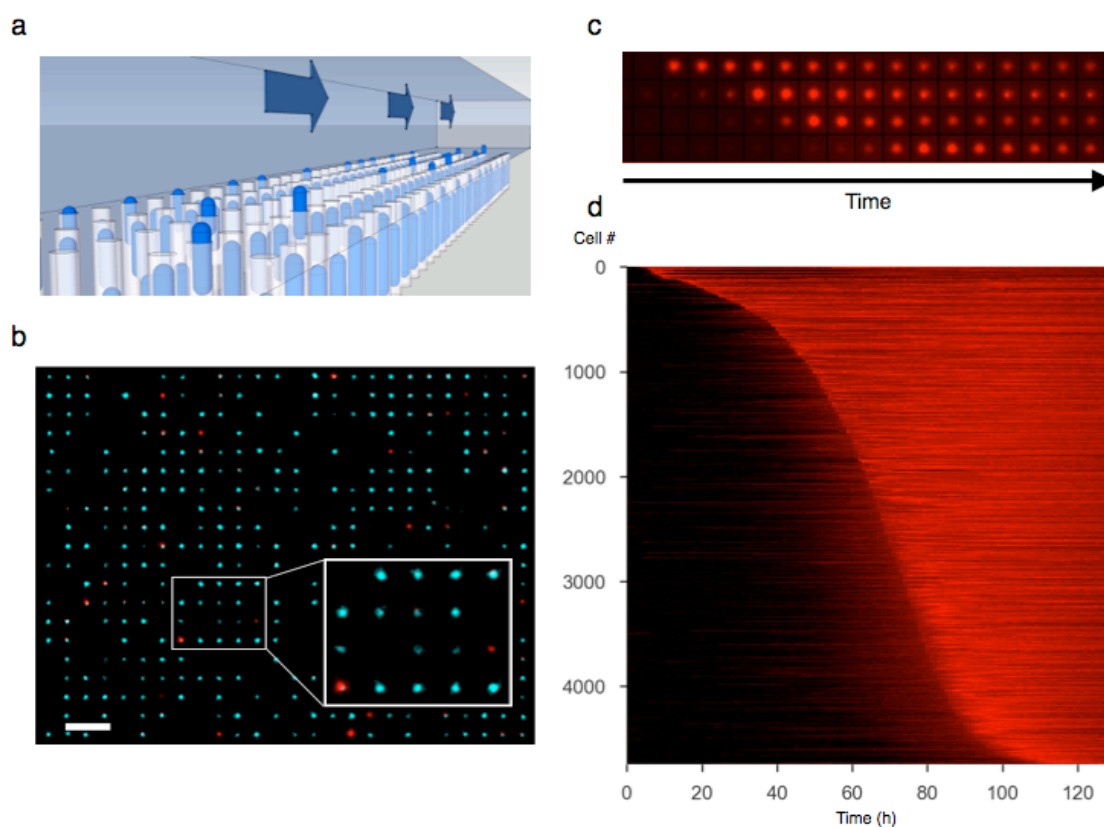

325  
326 **Figure 2.** Coupling microfluidic chip and time-lapse microscopy to measure *E. coli* lifespan  
327 distribution at single-cell resolution. **a**, 3D model of microfluidic devices used to trap and  
328 isolate large number of single cells. The blue-gray cube in the upper half of the picture  
329 represents the main flow channel where fresh, carbon-source-free media are supplied. The  
330 array of light-blue rods represents *E. coli* single-cells trapped in a 2D-array of cell-sized dead-  
331 end chambers. The arrows represent the media flow that maintain the environmental  
332 homogeneity and removes debris. **b**, Fluorescence microscopy image of the microfluidic  
333 device loaded with *E. coli* cells. Each fluorescent dot corresponds to a single cell trapped in  
334 the 2D array of dead-end wells. Z-axis focus is adjusted so that dead-ends of the micro-wells  
335 are imaged. The cyan pseudo-colour represents constitutively expressed fluorescent protein  
336 fluorescence signal; red pseudo-colour - Propidium Iodide (P.I.) fluorescent signal described  
337 in the text. **c**, Sample time-lapse P.I. images of mortality events, from early (top) to late  
338 (bottom) deaths. **d**, Heat map of P.I. signal time-series for a population of single cells. The

339 colour values of each row correspond to the time-series of one cell, ranked according to  
340 lifespan, top-to-bottom, from the shortest living to the longest living cell. The boundary  
341 between dark and bright red indicates the transition from life to death and defines the lifespan  
342 distribution. Dark strips after cell deaths indicate decaying DNA or empty wells after cell  
343 debris have been washed away. Data shown in **d** have been smoothed according to the  
344 procedure described in supplementary material to remove minor signal fluctuations coming  
345 from microscopy focusing. The same procedure is used before time-of-death is estimated.  
346



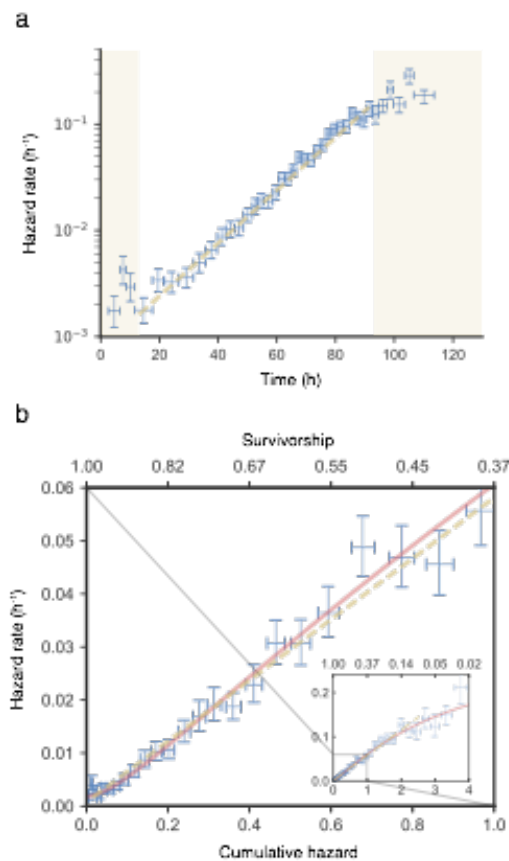

347  
348 **Figure 3.** Non-parametric estimation indicates that wildtype *E. coli* lifespan distribution can  
349 be characterised by the Gompertz law. Shown are non-parametric estimations of the hazard  
350 functions and cumulative hazard functions of the same populations in one particular  
351 microfluidic experiment. **a**, Binomial estimators of the hazard rates, shown in log scale. Cell  
352 deaths are binned into discrete time intervals, which are marked by the x-axis error bars. The  
353 time bins are chosen so that the Nelson-Aalen confidence intervals (CI) in b do not overlap  
354 with each other. Error bars on the y-axis are the 95% CI for hazard rate estimated based on  
355 binomial distribution. Yellow shading covers regions that deviate from the exponential  
356 hazard regime for the shortest and longest living individuals. **b**, Cumulative hazard dynamics  
357 in the phase plane. Data, binning intervals and y-axis are the same as those in **a**.  
358 Instantaneous hazard rates plotted against the cumulative hazards (bottom x-axis), or  
359 equivalently the negative logarithm of survivorship (top x-axis). Nelson-Aalen estimators are

360 used for the cumulative hazard function. The horizontal error bars are the 95% CI of the  
361 Nelson-Aalen estimator at the centre of the time bins. Dashed lines are maximum likelihood  
362 parametric estimations using the Gamma-Gompertz-Makeham model. The inset provides a  
363 zoom-out view of the whole data range, while the main figure zooms in on the first 63% of  
364 cell deaths.  
365

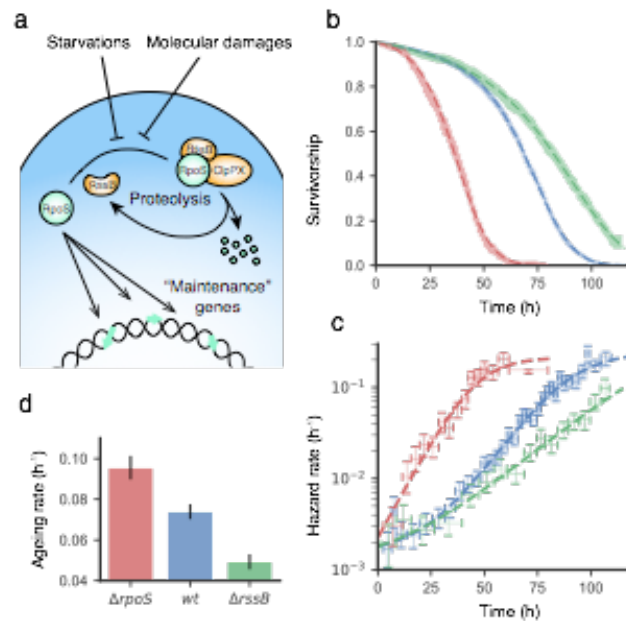

366

367 **Figure 4.** The general stress response of *E. coli* modulates ageing rate. The lifespan  
368 distribution for the wildtype (*wt*),  $\Delta rpoS$  (lacking general stress response) and  $\Delta rssB$   
369 (overexpressing the general stress response) strains are measured multiple times by  
370 independent microfluidic experiments. **a**, A scheme representing relevant regulatory features  
371 of the general stress response, and in particular the functions of the genes *rpoS* and *rssB*. **b**,  
372 Experimental and GGM model survivorship. Representing the experimental survivorship,  
373 colour bands are the 95% CI of the Kaplan-Meier (K-M) estimators. Coloured dashed lines  
374 are Gamma-Gompertz-Makeham (GGM) models whose parameters are estimated from  
375 maximum-likelihood (ML) methods. **c**, Hazard rates estimated using only cell deaths within  
376 discrete time intervals (Error bar markers), and GGM hazard models estimated from the  
377 whole dataset using ML methods. Similar to Fig. 3a, Vertical error bars are binomial 0.95  
378 confidence intervals and horizontal error bars are the binning time intervals. Data from **b** and  
379 **c** are from the same representative experimental cohorts for each strain. **d**, Ageing rates for  
380 each strain, estimated by ML-fitted GGM models to 3 independent experiments. Error bars  
381 represent 95% CI. The ageing rates are:  $b_{rpoS} = 0.095 \pm 0.006 \text{ h}^{-1}$ ,  $b_{rssB} = 0.049 \pm 0.004 \text{ h}^{-1}$  and  
382  $b_{wt} = 0.074 \pm 0.004 \text{ h}^{-1}$ .

383

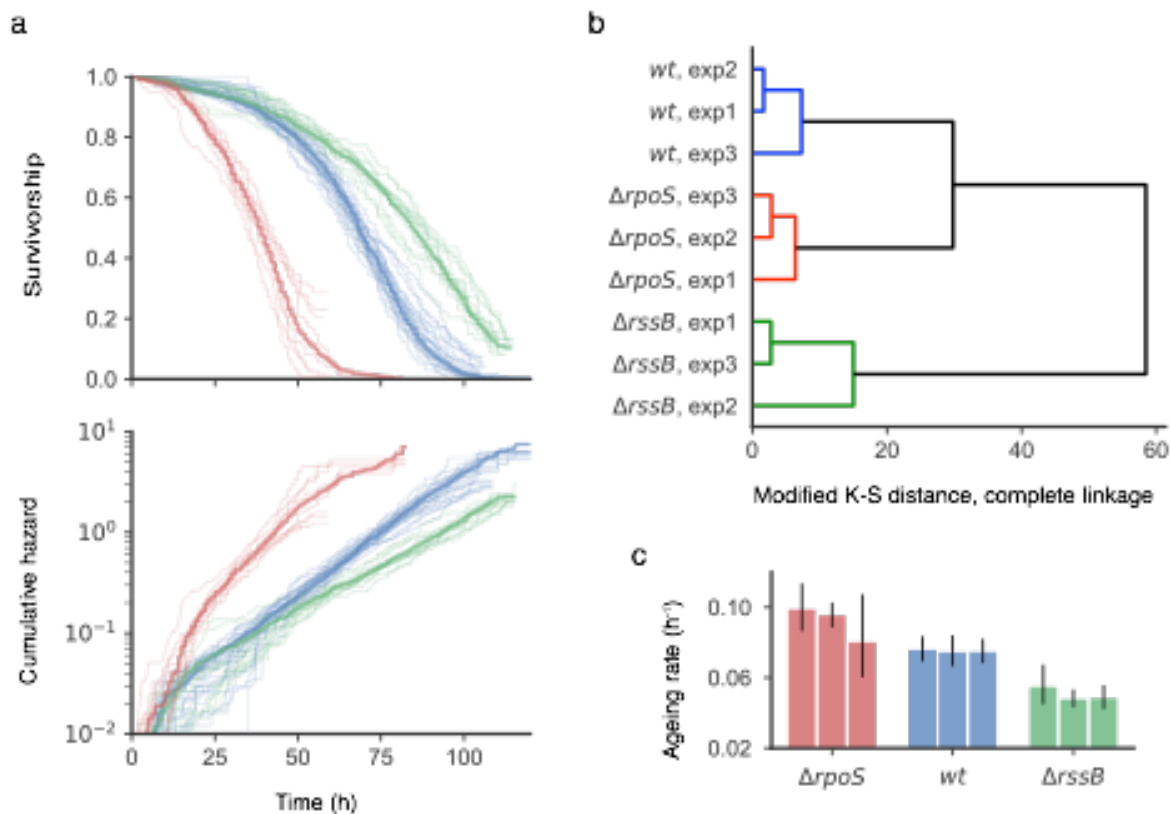

384  
385 **Figure 5.** Experimental repeatability and variances. For each of wildtype (*wt*), *ΔrpoS* and  
386 *ΔrssB* knockout strains, data from 3 independent experimental replicates are shown. **a**,  
387 Survivorship (Kaplan-Meier estimator, K-M) and cumulative hazards (Nelson-Aalen  
388 estimator, N-A) of sub-populations from different imaging positions. Thick opaque lines  
389 correspond to the data shown in Fig. 4b and c. Thin semi-transparent lines are the K-M and  
390 N-A estimators of sub-populations from different imaging positions, which are used to  
391 constitute the population represented by the opaque lines. Each sub-population is from one  
392 imaging position that corresponds to a roughly 125μm-sided square-patch on the microfluidic  
393 chip, and consists of 150-600 cells. Imaging positions with less than 50 cells are not shown.  
394 **b**, Hierarchical clustering of the 3 independent experimental replicates of each strain.  
395 Standard agglomerative clustering algorithm is applied using complete linkage and the 2-  
396 sample modified Kolmogorov-Smirnov statistic  $\sup\{|Y(t)|\}$  (See methods) as a distance  
397 metric. **c**, Ageing rates 3 independent experimental replicates of each strain. Ageing rates are

398 estimated similarly as those in Fig. 4d, but independently for each experimental replicate

399 without pooling them together using GLM. Error bars represent 95% CI.

400

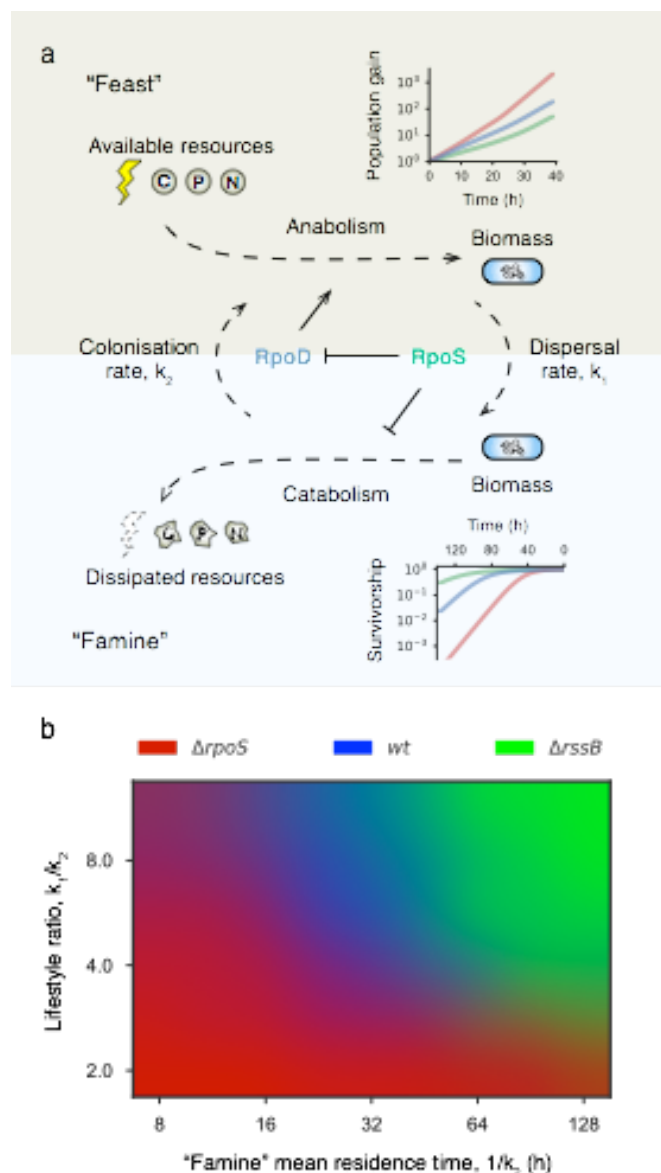

401  
 402 **Figure 6.** Trade-offs between growth and maintenance mediated by the *rpoS* pathway, and its  
 403 fitness consequences. **a**, Scheme of the ecological processes (dashed arrows) and regulatory  
 404 relationships (solid arrows) involved in the trade-offs mediated by *rpoS*. Environments are  
 405 structured by alternating episodes of "feast" and "famine". Fitness of  $\Delta rpoS$  (red), *wild-type*  
 406 (blue) and  $\Delta rssB$  (green) as functions of time spent in each environmental episode (age) are  
 407 plotted in the top and bottom axes. Fitness is defined as the logarithmic change of population  
 408 sizes. **b**, Fitness comparison of the 3 strains across a range of environmental conditions to  
 409 identify regimes favouring faster and slower ageing strategies. The colour-coded regions  
 410 identify environmental conditions under which one strain dominates over the other two.

411 Absolute fitness of the 3 strains are converted to RGB tuples using softmax normalisation.  
412 For each strain and each pair of environmental parameters, fitness is calculated by averaging  
413 the population growth/decline rates over 5000 episodes of both "feast" and "famine". Episode  
414 lengths are independently drawn from exponential distributions, parameterised by the two  
415 ecological rates,  $k_1$  and  $k_2$ , as shown in **a**. The fitness functions, population gain for "feast"  
416 and survivorship for "famine" (shown in the axes in **a**), are used to determine population size  
417 changes in each episode. See methods for details.  
418

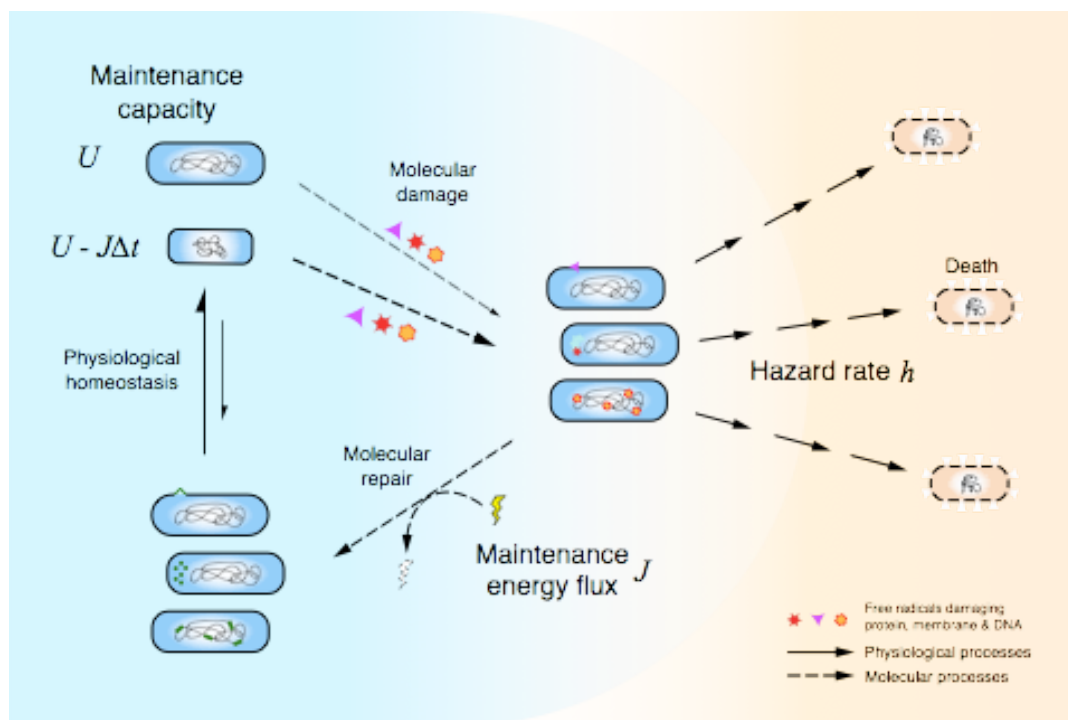

419

420 **Figure 7.** Gompertz law of mortality informs and constrains physiological models of ageing  
 421 and mortality in growth-arrested *E.coli* cells. Depicted are the abstract states and pathways  
 422 cells pass through during ageing and mortality. Acute damages to essential cellular  
 423 components, when unrepaired, often lead to cell death, quantified by  $h(t)$ . Cells could also  
 424 triage and repair these damages to return themselves back to physiological homeostasis. The  
 425 energy cost of this maintenance process,  $J(t)$ , termed maintenance energy<sup>13</sup>, need to be repaid  
 426 by either an external energy source or internal storage in the form of existing biomass. If we  
 427 assume it is the same set of acute molecular damages that kill the cells or lead to ageing, then  
 428  $J(t)$  could relate to  $h(t)$  proportionally,  $J(t) = R h(t)$  (eq1), where  $R$  is the "friction" coefficient  
 429 controlled by the relative proportions of the two fates of damaged cells: repair vs death. For  
 430 carbon-starved cells in our experiments, this flux of energy dissipation decreases the capacity  
 431 for molecular repair in the future,  $U(t)$ , leading to cellular senescence. Put it another way,  
 432  $dU(t)/dt = -J(t)$  (eq2). Through these assumptions, the hazard dynamics we described in this  
 433 work could be recast as the dynamics of maintenance capacity. Our experimental results  
 434 place non-trivial constraints on how the amount of maintenance capacity regulates the rate at



435 which cells are damaged molecularly in the first place. If we only consider the Gompertz  
436 regime, *i.e.*  $dh(t)/dt = bh(t)$  (eq3), combining with (eq1) (eq2) and differentiating on both  
437 sides, we have  $d^2U/dt^2 + b dU/dt = 0$  (eq3) and  $dU(t)/dt = -R h(0)$ , where  $b$  is the Gompertz  
438 ageing rate and  $R$  balance out the choice of  $t_0$  which should not alter the dynamics of (eq3).  
439 This framework could also be extended to growing populations by considering the equation  
440  $d^2U/dt^2 + b dU/dt + c(U) = 0$ , where  $c(U)$  is zero in low levels of  $U$  such as in growth arrest  
441 conditions, but theoretically could be larger than zero, pushing the physiology away from  
442 senescence but toward rejuvenation.  
443

## 444 References

- 445 1 Stroustrup, N. *et al.* The temporal scaling of *Caenorhabditis elegans* ageing. *Nature* **530**, 103-+,  
446 doi:10.1038/nature16550 (2016).
- 447 2 Gavrilov, L. A. & Gavrilova, N. S. The reliability theory of aging and longevity. *J Theor Biol* **213**,  
448 527-545, doi:10.1006/jtbi.2001.2430 (2001).
- 449 3 Jones, O. R. *et al.* Diversity of ageing across the tree of life. *Nature* **505**, 169-173,  
450 doi:10.1038/nature12789 (2014).
- 451 4 Kirkwood, T. B. & Holliday, R. The evolution of ageing and longevity. *Proc R Soc Lond B Biol Sci*  
452 **205**, 531-546 (1979).
- 453 5 Williams, G. C. Pleiotropy, Natural-Selection, and the Evolution of Senescence. *Evolution* **11**, 398-  
454 411, doi:10.2307/2406060 (1957).
- 455 6 Partridge, L. & Barton, N. H. Optimality, Mutation and the Evolution of Aging. *Nature* **362**, 305-311,  
456 doi:10.1038/362305a0 (1993).
- 457 7 Stewart, E. J., Madden, R., Paul, G. & Taddei, F. Aging and death in an organism that reproduces by  
458 morphologically symmetric division. *PLoS Biol* **3**, e45, doi:10.1371/journal.pbio.0030045 (2005).
- 459 8 Lindner, A. B., Madden, R., Demarez, A., Stewart, E. J. & Taddei, F. Asymmetric segregation of  
460 protein aggregates is associated with cellular aging and rejuvenation. *Proc Natl Acad Sci U S A* **105**,  
461 3076-3081, doi:10.1073/pnas.0708931105 (2008).
- 462 9 Wang, P. *et al.* Robust growth of *Escherichia coli*. *Curr Biol* **20**, 1099-1103,  
463 doi:10.1016/j.cub.2010.04.045 (2010).
- 464 10 Gefen, O., Fridman, O., Ronin, I. & Balaban, N. Q. Direct observation of single stationary-phase  
465 bacteria reveals a surprisingly long period of constant protein production activity. *Proc Natl Acad Sci*  
466 *U S A* **111**, 556-561, doi:10.1073/pnas.1314114111 (2014).
- 467 11 Nystrom, T. Aging in bacteria. *Curr Opin Microbiol* **5**, 596-601 (2002).
- 468 12 Monod, J. *Recherches sur la croissance des cultures bactériennes*. (Hermann, 1942).
- 469 13 Pirt, S. J. The maintenance energy of bacteria in growing cultures. *Proc R Soc Lond B Biol Sci* **163**,  
470 224-231 (1965).
- 471 14 Ericsson, M., Hanstorp, D., Hagberg, P., Enger, J. & Nystrom, T. Sorting out bacterial viability with  
472 optical tweezers. *J Bacteriol* **182**, 5551-5555 (2000).
- 473 15 Gompertz, B. On the Nature of the Function Expressive of the Law of Human Mortality, and on a New  
474 Mode of Determining the Value of Life Contingencies. *Philosophical Transactions of the Royal*  
475 *Society of London* **115**, 513-583 (1825).
- 476 16 Kirkwood, T. B. Deciphering death: a commentary on Gompertz (1825) 'On the nature of the function  
477 expressive of the law of human mortality, and on a new mode of determining the value of life  
478 contingencies'. *Philos Trans R Soc Lond B Biol Sci* **370**, doi:10.1098/rstb.2014.0379 (2015).
- 479 17 Aalen, O., Borgan, O. & Gjessing, H. *Survival and Event History Analysis: A Process Point of View*  
480 *(Statistics for Biology and Health)*. (Springer, 2008).
- 481 18 Barbi, E., Lagona, F., Marsili, M., Vaupel, J. W. & Wachter, K. W. The plateau of human mortality:  
482 Demography of longevity pioneers. *Science* **360**, 1459-1461, doi:10.1126/science.aat3119 (2018).
- 483 19 Makeham, W. M. On the Law of Mortality and the Construction of Annuity Tables. *The Assurance*  
484 *Magazine, and Journal of the Institute of Actuaries* **8**, 301-310 (1860).
- 485 20 Vaupel, J. W. *et al.* Biodemographic trajectories of longevity. *Science* **280**, 855-860 (1998).
- 486 21 Yashin, A. I., Vaupel, J. W. & Iachine, I. A. A duality in aging: the equivalence of mortality models  
487 based on radically different concepts. *Mech Ageing Dev* **74**, 1-14 (1994).
- 488 22 Kirkwood, T. B. & Austad, S. N. Why do we age? *Nature* **408**, 233-238, doi:10.1038/35041682  
489 (2000).
- 490 23 Fontaine, F., Stewart, E. J., Lindner, A. B. & Taddei, F. Mutations in two global regulators lower  
491 individual mortality in *Escherichia coli*. *Mol Microbiol* **67**, 2-14, doi:10.1111/j.1365-  
492 2958.2007.05988.x (2008).
- 493 24 Fontana, L., Partridge, L. & Longo, V. D. Extending healthy life span--from yeast to humans. *Science*  
494 **328**, 321-326, doi:10.1126/science.1172539 (2010).
- 495 25 Kenyon, C., Chang, J., Gensch, E., Rudner, A. & Tabtiang, R. A *C. elegans* mutant that lives twice as  
496 long as wild type. *Nature* **366**, 461-464, doi:10.1038/366461a0 (1993).
- 497 26 Pedro de Magalhaes, J. *et al.* A Reassessment of Genes Modulating Aging in Mice Using Demographic  
498 Measurements of the Rate of Aging. *Genetics* **208**, 1617-1630, doi:10.1534/genetics.118.300821  
499 (2018).
- 500 27 Battesti, A., Majdalani, N. & Gottesman, S. The RpoS-mediated general stress response in *Escherichia*  
501 *coli*. *Annu Rev Microbiol* **65**, 189-213, doi:10.1146/annurev-micro-090110-102946 (2011).

- 502 28 Peterson, C. N., Levchenko, I., Rabinowitz, J. D., Baker, T. A. & Silhavy, T. J. RpoS proteolysis is  
503 controlled directly by ATP levels in Escherichia coli. *Genes Dev* **26**, 548-553,  
504 doi:10.1101/gad.183517.111 (2012).
- 505 29 Kuroda, A. *et al.* Role of inorganic polyphosphate in promoting ribosomal protein degradation by the  
506 Lon protease in E. coli. *Science* **293**, 705-708, doi:10.1126/science.1061315 (2001).
- 507 30 Lever, M. A. *et al.* Life under extreme energy limitation: a synthesis of laboratory- and field-based  
508 investigations. *FEMS Microbiol Rev* **39**, 688-728, doi:10.1093/femsre/fuv020 (2015).
- 509 31 Radzikowski, J. L. *et al.* Bacterial persistence is an active sigmaS stress response to metabolic flux  
510 limitation. *Mol Syst Biol* **12**, 882, doi:10.15252/msb.20166998 (2016).
- 511 32 Medawar, P. B. *An Unsolved Problem of Biology: An Inaugural Lecture Delivered at University*  
512 *College, London, 6 December, 1951.* (H.K. Lewis and Company, 1952).
- 513 33 Mauri, M. & Klumpp, S. A model for sigma factor competition in bacterial cells. *PLoS Comput Biol*  
514 **10**, e1003845, doi:10.1371/journal.pcbi.1003845 (2014).
- 515 34 Scott, M., Gunderson, C. W., Mateescu, E. M., Zhang, Z. & Hwa, T. Interdependence of cell growth  
516 and gene expression: origins and consequences. *Science* **330**, 1099-1102, doi:10.1126/science.1192588  
517 (2010).
- 518 35 Maharjan, R., Seeto, S., Notley-McRobb, L. & Ferenci, T. Clonal adaptive radiation in a constant  
519 environment. *Science* **313**, 514-517, doi:10.1126/science.1129865 (2006).
- 520 36 Spira, B., de Almeida Toledo, R., Maharjan, R. P. & Ferenci, T. The uncertain consequences of  
521 transferring bacterial strains between laboratories - rpoS instability as an example. *BMC Microbiol* **11**,  
522 248, doi:10.1186/1471-2180-11-248 (2011).
- 523 37 Hol, F. J. *et al.* Spatial structure facilitates cooperation in a social dilemma: empirical evidence from a  
524 bacterial community. *PLoS One* **8**, e77042, doi:10.1371/journal.pone.0077042 (2013).
- 525 38 Vulic, M. & Kolter, R. Evolutionary cheating in Escherichia coli stationary phase cultures. *Genetics*  
526 **158**, 519-526 (2001).
- 527 39 Hengge, R. in *Bacterial Stress Responses, Second Edition* (American Society of Microbiology,  
528 2011).
- 529

530

## 531 **Methods**

### 532 **Experimental methods**

#### 533 *Microfluidic chip fabrication*

534 Our Polydimethylsiloxane (PDMS) lab-on-a-chip system consists of two layers,  
535 containing the flow channel and the array of cell-sized chambers. The two layers are  
536 fabricated separately using soft-lithography technology, and then bonded together to produce  
537 the microfluidic device (Fig. S2)

538 To fabricate the negative master for the piece containing the flow channel, SU8 3050  
539 photoresist (Microchem, MA, USA) was patterned on a silicon wafer using photolithography.  
540 SU8 3050 was spin-coated on a silicon wafer at 4000 rpm for 30 seconds, baked at 95 °C for  
541 15 minutes, and then subjected to UV exposure (25 s, 10m W/cm<sup>2</sup>). After post-exposure  
542 baking (95 °C for 5 minutes), the master was developed using SU8 developer (Microchem,  
543 USA), rinsed with isopropanol and dried with filtered nitrogen.

544 The master for the layer with cell-sized chambers was fabricated using reactive ion  
545 etching (R.I.E.) technology on a silicon wafer. The mask was patterned on a silicon wafer  
546 using photoresist AZ5214 (Microchem, USA), and a 100-nm layer of nickel was sputtered on  
547 to the substrate. A lift-off procedure was applied to remove the photoresist layer yielding the  
548 metal mask for the R.I.E. process. By adjusting the R.I.E. parameters ( $\text{SF}_6 = 4$  sccm,  $\text{CHF}_3 =$   
549  $16$  sccm, pressure = 10 mTorr and power = 30 W), we managed to achieve a large array of  
550 micro-pillars with high aspect ratio (diameter = 1.2  $\mu\text{m}$  and height = 6  $\mu\text{m}$ ).

551 To form the device, PDMS mixtures (RTV615, Momentive Performance Materials  
552 Inc., Waterford, NY) were poured (flow channel) and spin-coated (array) onto the masters to  
553 a thickness of 5 mm (main channel) and 80  $\mu\text{m}$  (array) respectively. Heat curing initially  
554 formed solid PDMS layers with patterned surfaces. After drilling inlets and outlets through  
555 the flow channel layer, and mounting the array layers onto cover glasses, the two layers were

556 then bonded together using oxygen plasma (90s, 1000 mTorr). Finally, the assemblies were  
557 cured at 80 °C overnight to produce the integrated microfluidic chips. On the day of use, the  
558 wetted surfaces of the PDMS chip were first activated by 90s exposure to oxygen plasma  
559 (90s, 250 mTorr) immediately followed by infusion of 20% (v/v) polyethylene glycol  
560 (PEG400) solution to prevent bacterial adhesion and biofilm formation.

### 561 *Media preparation*

562 All equipment used for media preparation, sterilisation and infusion were made of  
563 non-leaching materials (glass, Polytetrafluoroethylene or similar perfluoropolymer material)  
564 to avoid contamination with trace level carbon sources from leachable plastic additives (see  
565 supplementary material for details). Media were filter sterilised (0.2 µm) to avoid volatile  
566 organic contamination during autoclaving, and glassware was sterilised by dry heat. Carbon-  
567 free minimum media mentioned below refer to those prepared in this fashion.

### 568 *Strain information*

569 All lifespan distributions described in the main text are measured for strains of the  
570 Keio *E. coli* BW25113 strain ("wildtype") single-gene knockout collection<sup>40</sup>. For the  
571 knockout strains, the presence and location of genomic inserts were verified by kanamycin  
572 resistance and PCR amplification. The general stress response phenotypes of  $\Delta rpoS$  and  
573  $\Delta rssB$  were verified using the catalase test. In addition, in developing the microfluidic device  
574 and validation of our method, we used an MG1655 derived *E. coli* strain with a  
575 chromosomally integrated CFP under P<sub>2rrnB</sub> constitutive promoter<sup>41</sup> (Fig. 2b).

### 576 *Cell culture and loading*

577 Single isolated colonies of the bacterial strains *E. coli* wildtype,  $\Delta rpoS$  and  $\Delta rssB$   
578 were grown overnight in minimal medium (1 × M9 salts, 2 mM MgSO<sub>4</sub> and 0.1 mM CaCl<sub>2</sub>)  
579 supplemented with 20% w/v glucose (final concentration 0.4%). The following day the  
580 overnight cultures were diluted 200-fold in 50 mL of fresh medium in 250 mL Erlenmeyer

581 flasks and grown to early exponential phase ( $OD_{600} = 0.2$ ). This growth phase was chosen to  
582 guarantee that the variation of birth time among cells was less than one cell cycle and thus to  
583 minimise the uncertainty of lifespan measurement. Cells were concentrated by centrifugation  
584 (4,000 rpm x 15 min, 37 °C) and washed by 3 cycles of gentle re-suspension with carbon-free  
585 minimal medium and centrifugation prior to injection into the microfluidic channels. Cells  
586 were then trapped into the dead-ended wells by centrifugation at 2,000 rpm for 15 min at 37  
587 °C with a surface density up to  $6.25 \times 10^4$  cells/mm<sup>2</sup>. The main channels were then thoroughly  
588 washed with carbon-free minimal medium.

### 589 *Experimental setup and microscopy*

590 A constant flow of carbon-free M9 minimal medium at 20µl per hour was provided to  
591 the micro-channels using a high-precision syringe pump (Harvard Apparatus PHD 2000  
592 Programmable) and Hamilton GC-grade glass/PTFE syringes (Gastight 1000 Series). PTFE  
593 tubing was used to connect the syringes to the microfluidic chip. The medium was  
594 supplemented with 1.5% (v/v) polyethylene glycol (PEG400) to prevent unspecific adherence  
595 of cells to the channels and 5 µg/mL propidium iodide, as a fluorescent indicator of cell  
596 viability, was added. Cell viability was monitored using temperature-controlled (37 °C)  
597 automatic time-lapse microscopy (Zeiss AX10, 63x oil-immersion objective, controlled with  
598 MetaMorph® software). Focus was maintained by a Z-scanning maximum-contrast  
599 procedure using phase-contrast illumination. Focus was re-adjusted before each imaging  
600 cycle for every position and maintained within a Z-range of 0.2µm around the maximum-  
601 contrast Z-position. Phase-contrast and fluorescence images (P.I. signal ex. 546nm/12nm,  
602 em. 605nm/75nm) were acquired for every stage position once every hour for up to 150  
603 hours.

### 604 *Growth phenotypes*

605 Growth phenotypes of aforementioned *E. coli* strains on selected carbon sources in  
606 minimal media were measured in the 96-well format using a TECAN Spark® microplate  
607 reader. To induce the appropriate metabolic enzymes before growth curves can be measured,  
608 strains were first grown for 24 hours in minimal medium (M9, as in those used for  
609 microfluidic experiments) supplemented with the assayed carbon sources. The optimal  
610 densities of these cultures were determined, and diluted into fresh media identical to those  
611 used for the overnight cultures. The dilution ratios were chosen so that all experimental cell  
612 cultures have an initial optimal density of  $OD_{600} = 0.002$ . For each experimental well on the  
613 microplates, 50 $\mu$ l mineral oil was added to 100 $\mu$ l cell culture to prevent evaporation during  
614 the experiments. The microplates were then maintained at 37°C, and shaken constantly in  
615 double-orbital motion at 150rpm by the plate reader. Microplates with flat-bottomed wells  
616 were used to maximise agitation.  $OD_{600}$  readings were taken every 10min. The growth  
617 phenotypes used in Fig. 6 are based on minimum media culture supplemented with 60mM  
618 acetate as the carbon source.

619

## 620 **Statistical and computational methods**

### 621 *Image analysis*

622 The cells in our experiments were trapped in an evenly spaced 2D-grid. The  
623 fluorescence signals of every cell throughout their whole lifespans could be extracted at fixed  
624 positions, once images in the time-lapse stack were properly registered. A simple registration  
625 procedure might misidentify one cell for another because the cells are vertically imaged and  
626 look very similar to each other if only local features are considered. To register the images  
627 based on global features, such as the presence/absence of cells at individual grid positions,  
628 we devised a two-pass, coarse-to-fine registration strategy. Cells were first identified and  
629 segmented within the images using the Point-Spread Function<sup>42</sup>. These segmented binary

630 image stacks containing global information were registered in a coarse pass using least-  
631 square minimisation. The obtained 2D-translations were applied to the original images. A  
632 second fine registration pass was executed on these pre-registered original images using the  
633 Pyramid Approach<sup>43</sup>. After registration, the salient positions of cells were detected on the Z-  
634 projected images of the whole time-lapse stacks, and fluorescence time-series were extracted  
635 from these positions.

### 636 *Regularised estimation of P.I. signal*

637 To determine the true P.I. signal of each individual cell and to remove the noisy  
638 effects of focusing fluctuations, we designed and implemented a correction algorithm to the  
639 raw fluorescence intensity time-series (Fig. S3). Our three-step algorithm estimated the  
640 focusing noises of each imaging position, and deduced them from the raw time-series to  
641 arrive at the true P.I. signals of each cell. The first step of our algorithm took advantage of the  
642 fact that focusing fluctuations should change synchronously the intensities of all fluorescent  
643 objects within an imaging position, while the true P.I. signal from the cells should move  
644 independently of each other. By averaging the fold changes in intensities over all cells within  
645 a given time-lapse image stack, the focusing noise was enhanced while cell-specific signals  
646 were spread over hundreds of independent time-series. In the second step, the averaged fold  
647 changes was decomposed into focusing noises and population-wide P.I. trends. This was  
648 possible because noise from focusing should have very quick fluctuations (small  
649 autocorrelation time on the order of imaging cycles) yet no long-term trends (focusing was  
650 maintained with a narrow Z-range of 0.2 $\mu$ m). We applied a Total Variation Regularisation  
651 algorithm<sup>44</sup> to effectively de-noise the average fold changes to produce the population-wide  
652 long term trends. In the last step, the population-wide P.I. trends were combined with the  
653 cell-specific signals to recover the true P.I. signals used to determine the times of death. See  
654 Fig. S3 for the details and the effects of the algorithm.



655 *Survival analysis*

656 Populations within the same microfluidic channels were followed at multiple imaging  
657 positions, distributed evenly throughout the flow channel. We tested the statistical  
658 consistency and homogeneity of lifespan distributions among subpopulations at different  
659 imaging positions within the same channel (see Fig. 5a and Fig. S4 for examples of such  
660 subpopulations). The P.I. time-series data and lifespan distributions from each imaging  
661 position were visualised in the style of Fig. 2d (Fig. S4a). Statistically, we tested for non-  
662 parametric differences between subpopulation lifespan distributions using a two-sample  
663 Kolmogorov-Smirnov statistic  $\sup\{|Y(t)|\}$ , *i.e.* the supremum of empirical distribution  
664 distances  $|Y(t)|$  normalised to account for censorship<sup>45</sup> (Fig. S4b).

665 After passing the consistency test, the subpopulations from the same channel were  
666 merged to form the experimental cohorts. The lifespan data of each cohort was fitted  
667 parametrically using the family of lifespan distributions described in the main text. Maximum  
668 likelihood (ML) estimators of the model parameters and their confidence intervals were  
669 obtained using the R package 'flexsurv'. We tested the 2-, 3- or 4-parameter hazard models  
670 mentioned in the main text, with the 4-parameter Gamma-Gompertz-Makeham (GGM)  
671 model being the most general, and chose the best among these candidate models according to  
672 the Akaike Information Criterion (AIC) at their maximum-likelihood parameters.

673 Goodness-of-fit of the ML models were tested using the one-sample version of  
674  $\sup\{|Y(t)|\}$ . The best models and their fitting residues  $Y(t)$  were plotted in supplementary  
675 material. For comparison and visual inspection, we also plotted alongside the Kaplan-Meier  
676 estimators for survivorship, Nelson-Aalen estimators for cumulative hazards and their  
677 respective 95% C.I..

678 *Experimental design and experimental variation analysis*

679 Three independent experimental cohorts were tracked on separate dates for each  
680 strain. Two statistical methodologies were used to assess the level of experimental variability,  
681 and test for significant differences in lifespan distribution and its parameters among the  
682 strains. Overall variations in lifespan distribution were analysed using hierarchical clustering.  
683 The two-sample Kolmogorov-Smirnov statistic  $\sup\{|Y(t)|\}^{1,45}$  mentioned in the previous  
684 section was used as a distance measure in complete linkage clustering. Preferential  
685 aggregation of experimental cohorts of the same genotype within the lower branches of the  
686 clustering tree was taken as evidence that lifespan distributions of the strains were  
687 significantly different.

688 Because the GGM model adequately described our data, we also analysed variability  
689 of its parameters and the sources of said variability. Generalised Linear Models (GLMs) with  
690 GGM as the probability distribution were built to examine the explanatory power of  
691 categorical covariates such as experimental cohorts (*exp*) or strain genotypes (*strain*).  
692 Specifically, the null hypothesis  $H_0$  that cohorts with the same genotype have the same  
693 ageing rate  $b$  were tested against the alternative hypothesis  $H_1$  that experiment cohorts all  
694 have significantly different ageing rates regardless of their genotypes. Since  $H_0$  is a special  
695 case of  $H_1$ , both  $\Delta AIC$  and likelihood ratio test were used and  $H_1$  was rejected. See  
696 supplementary material to see more details on GLM model selection and hypothesis testing.

### 697 *Fitness models*

698 Fitness is defined over a time period  $(t_1, t_2)$  as  $f(s, t_1, t_2) = \Delta \ln(\text{population size}) / (t_2 - t_1)$ ,  
699 where  $s$  denotes one of the 3 strains. We calculate fitness based on time spent in "feast" or  
700 "famine" episodes. These fitness functions were extrapolated from experimental data. For  
701 "famine" episodes, changes in logarithmic population size were simply the negatives of  
702 cumulative hazards  $H(t_1) - H(t_2)$ , so that  $f_{\text{famine}}(s, t_1, t_2) = [H_s(t_1) - H_s(t_2)] / (t_2 - t_1)$ . Extrapolations  
703 from experimental data were done using the fitted GGM models. For "feast" episodes,

704  $f_{\text{feast}}(s, t_1, t_2) = \frac{1}{t_2 - t_1} \int_{t_1}^{t_2} \mu_s(t) dt$ . Specific growth rates  $\mu_s(t)$  and maximum growth rates  $\mu_s^{\text{max}}$   
705 were determined from the experimental growth curves smoothed by cubic B-Splines. For  
706 "feast" episodes longer than the time at which  $\mu_s^{\text{max}}$  was reached, we assumed exponential  
707 growth at  $\mu_s^{\text{max}}$ .

708 Overall fitness  $f(s, k_1, k_2)$  of each strain at a given set of environmental parameters  $k_1$   
709 and  $k_2$ , is calculated by averaging the episodic fitness  $f_{\text{famine}}$  and  $f_{\text{feast}}$  over 5000 episodes of  
710 both "feast"  $\tau_{e,i}$  and "famine"  $\tau_{m,i}$ , where  $i = 1, \dots, 5000$ . Episode lengths  $\tau_{e,i}$  and  $\tau_{m,i}$  are  
711 independently drawn from exponential distributions parameterised by the two ecological  
712 rates,  $k_1$  and  $k_2$ , as shown in Fig. 6a. In summary, the formula for over fitness is  $f(s, k_1, k_2) =$

$$713 \frac{\int_0^{\tau_{e,i}} \mu_s(t) dt - \Delta_0^{\tau_{m,i}} H_s(t)}{\sum_i \tau_{e,i} + \sum_i \tau_{m,i}}.$$

714 For visual comparison in the form of the colourmap in Fig. 6b, for each set of  
715 environmental parameters  $(k_1, k_2)$ , the fitness of the 3 strains are combined into a 3-tuple and  
716 normalised using the softmax function. If we simply denote average fitness of strain  $s$  as  $f_s$ ,  
717 the formula for the elements of 3-tuple is  $\frac{e^{Tf_s}}{\sum_s e^{Tf_s}}$ , where  $T$  is the comparison timespan and is  
718 chosen to be 200 hours in Fig. 6b.

### 719 *Programming codes and data availability*

720 The image analysis procedure described above was implemented in Java as an ImageJ  
721 plugin. Fitness modelling, plotting and timeseries analyses including noise correction and  
722 time-of-death determination were implemented in Python. We relied on R package 'flexsurv'  
723 for the core algorithm of survival analysis and GLM, and Python package 'rpy2' was used for  
724 interoperability between the Python and R codes. All source codes and data are made  
725 available through GitHub.

- 726  
727 40 Baba, T. *et al.* Construction of Escherichia coli K-12 in-frame, single-gene knockout mutants: the Keio  
728 collection. *Mol Syst Biol* **2**, 2006 0008, doi:10.1038/msb4100050 (2006).  
729 41 Giraud, A. *et al.* Dissecting the genetic components of adaptation of Escherichia coli to the mouse gut.  
730 *PLoS Genet* **4**, e2, doi:10.1371/journal.pgen.0040002 (2008).  
731 42 Yang, Y., Song, X. & Lindner, A. B. in *Methods in Microbiology* Vol. 43 (eds Colin Harwood &  
732 Grant J. Jensen) 49-68 (Academic Press, 2016).  
733 43 Thevenaz, P., Ruttimann, U. E. & Unser, M. A pyramid approach to subpixel registration based on  
734 intensity. *IEEE Trans Image Process* **7**, 27-41, doi:10.1109/83.650848 (1998).  
735 44 Chartrand, R. Numerical Differentiation of Noisy, Nonsmooth Data. *ISRN Applied Mathematics* **2011**,  
736 11, doi:10.5402/2011/164564 (2011).  
737 45 Fleming, T. R., O'Fallon, J. R., O'Brien, P. C. & Harrington, D. P. Modified Kolmogorov-Smirnov  
738 Test Procedures with Application to Arbitrarily Right-Censored Data. *Biometrics* **36**, 607-625,  
739 doi:10.2307/2556114 (1980).

740

741

742 **Supplemental Information**

743

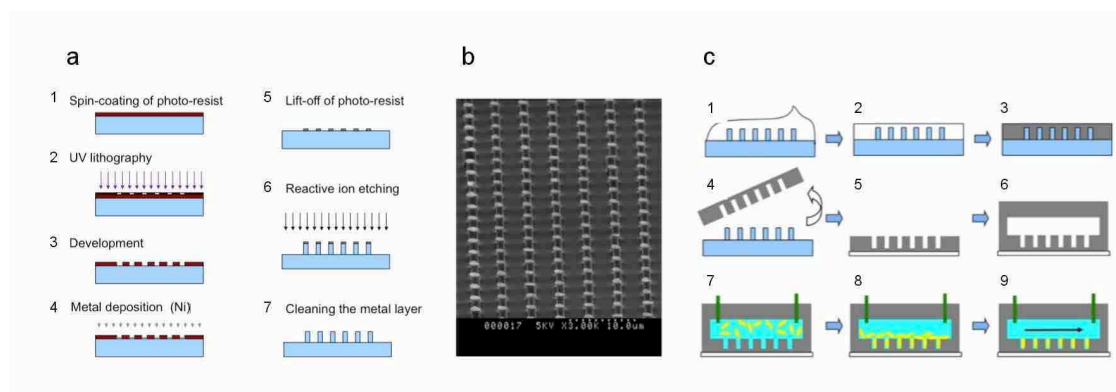

744

745 **Figure S1.** Fabrication and implementation of the 2-layer microfluidic chip. **a**, Fabrication

746 protocol of the master for the array of cell-sized chambers. The blue shapes represent the

747 transformations of one piece of silicon wafer. **b**, the electro-microscopy image of the silicon

748 master. Spatial period of the array is 4 μm; the diameter and height of the pillars are 1.2 μm

749 and height = 6 μm, respectively. **c**, The production of the 2-layer PDMS chips and the

750 preparation and loading of the chip for lifespan tracking. White and black shapes represent

751 uncured and cured PDMS respectively. Cyan and yellow represent cell culture media and

752 bacterial cells.

753

754

755

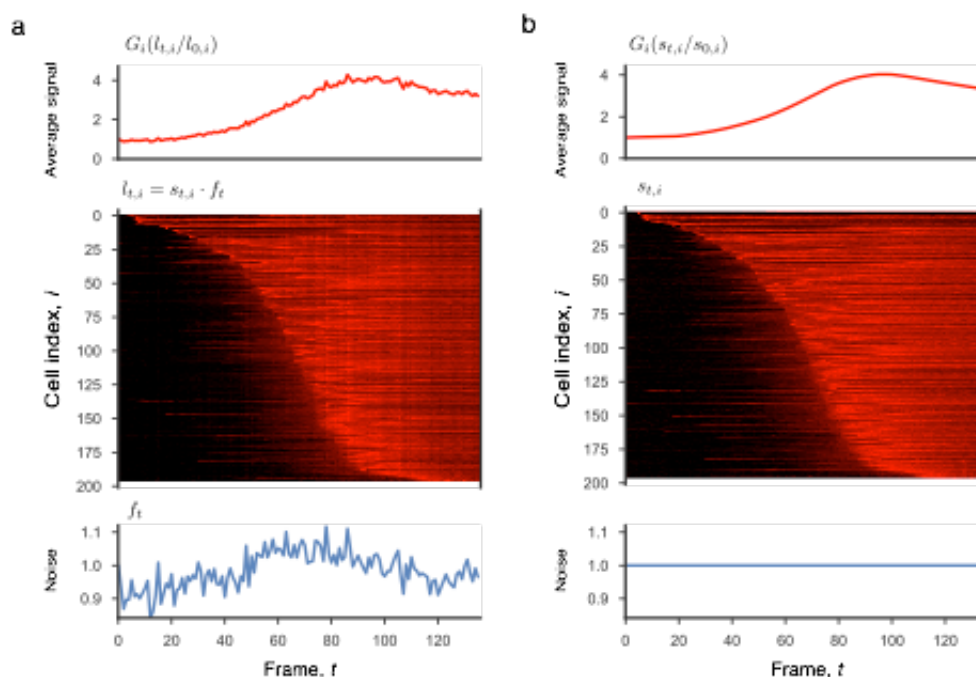

756

757 **Figure S2.** Regularised estimation of P.I. Signal to remove noise from focusing fluctuations.

758 Average raw intensities (top), individual PI time-series from single cells ranked by estimated

759 lifespan (middle) and estimated focusing noise (bottom) from one sample imaging position,

760 **a**, before the algorithm **b**, after the algorithm. We assume that focusing fluctuations affect all

761 areas within an image positions similarly, introducing a cell independent multiplicative noise

762  $f_t$  term to the true PI signal  $s_{i,t}$  of each cell. Thus the observed intensities extracted from the

763 image stack are  $l_{i,t} = f_t s_{i,t}$  assuming  $f_t = 1$ .  $f_t$  can be visualised as vertical stripes in the middle

764 panel of **a**. The first step of the algorithm takes the geometric mean of  $l_{i,t}/l_{i,0}$  over  $i$ , so that

765  $G_i(l_{i,t}/l_{i,0}) = f_t G_i(s_{i,t}/s_{i,0})$ , *i.e.* the average log raw intensities consist of two terms: the focusing

766 noise and the average PI signal fold changes. In the second step, as explained in Methods, the

767 average PI signal  $G_i(s_{i,t}/s_{i,0})$  is estimated using Total Variation Regularisation<sup>44</sup> of  $G_i(l_{i,t}/l_{i,0})$ ,

768 while the remaining component is assumed to be  $f_t$ , assuming that  $G_i(s_{i,t}/s_{i,0})$  changes

769 gradually while  $f_t$  has short temporal correlations and large temporal derivatives.  $G_i(s_{i,t}/s_{i,0})$

770 and  $f_t$  of the example imaging position are visualised in the top panel of **b** and bottom panel

771 of **a** respectively.

772

773

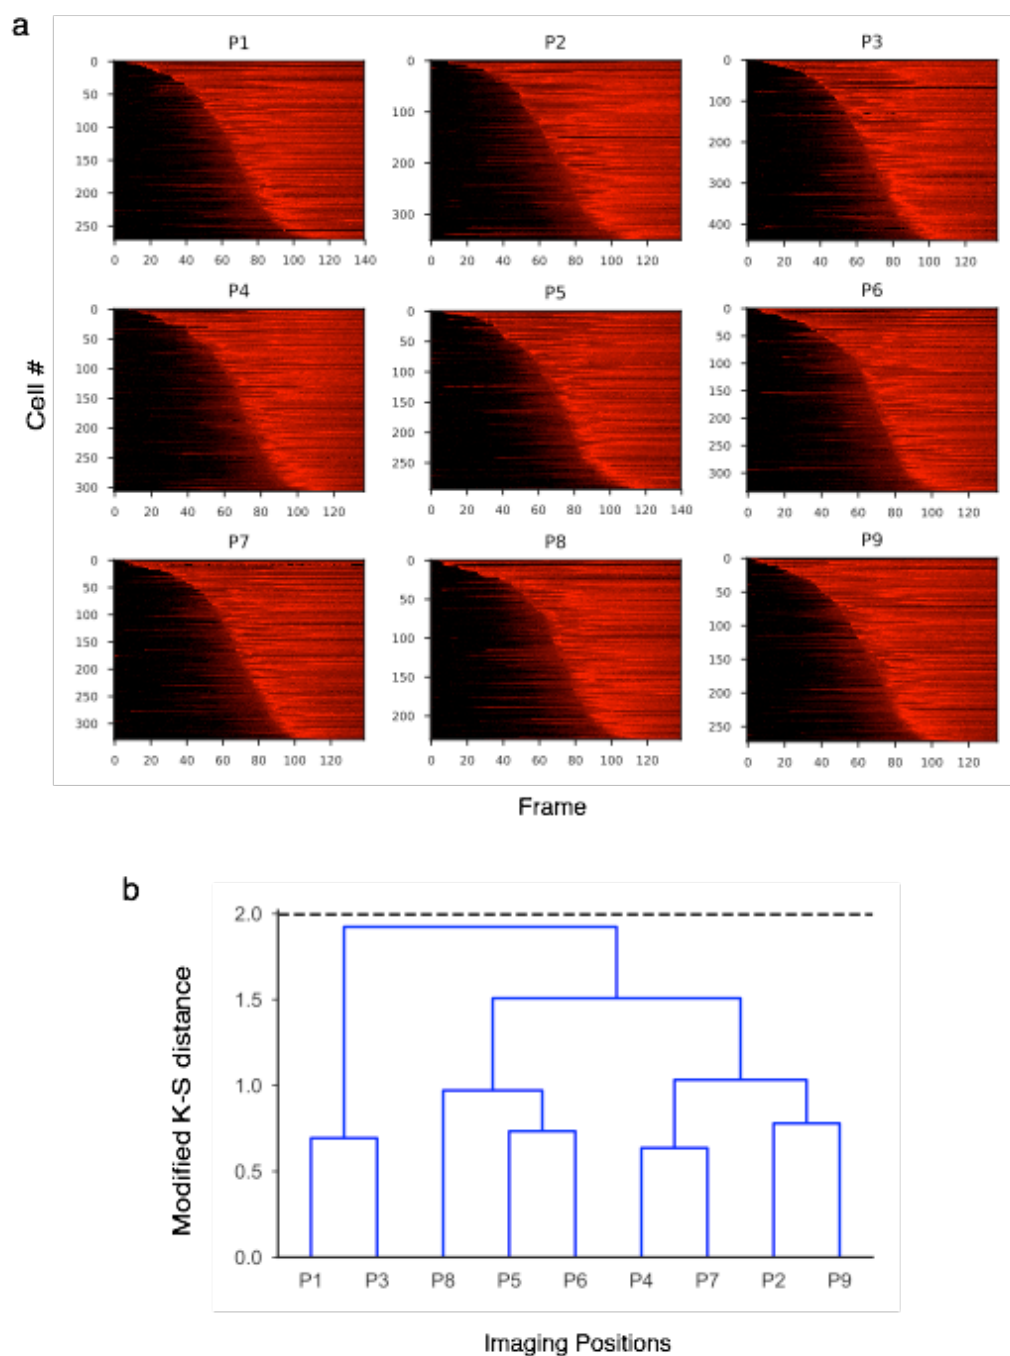

774

775 **Figure S3.** Visualisation and non-parametric statistics of variability among imaging positions

776 within one experimental cohort. **a**, Lifespan distributions and PI time-series of sub-

777 populations from all imaging positions within one microfluidic channels, visualised in the

778 style of of Fig. 1d. **b**, Hierarchical clustering of these sub-populations. Standard

779 agglomerative clustering algorithm is applied using complete linkage and the 2-sample

780 modified Kolmogorov-Smirnov statistic  $\sup\{|Y(t)|\}$  as a distance metric. Dashed line

781 corresponds to 0.05 two-tailed significance level adjusted for multiple testing.

782



783

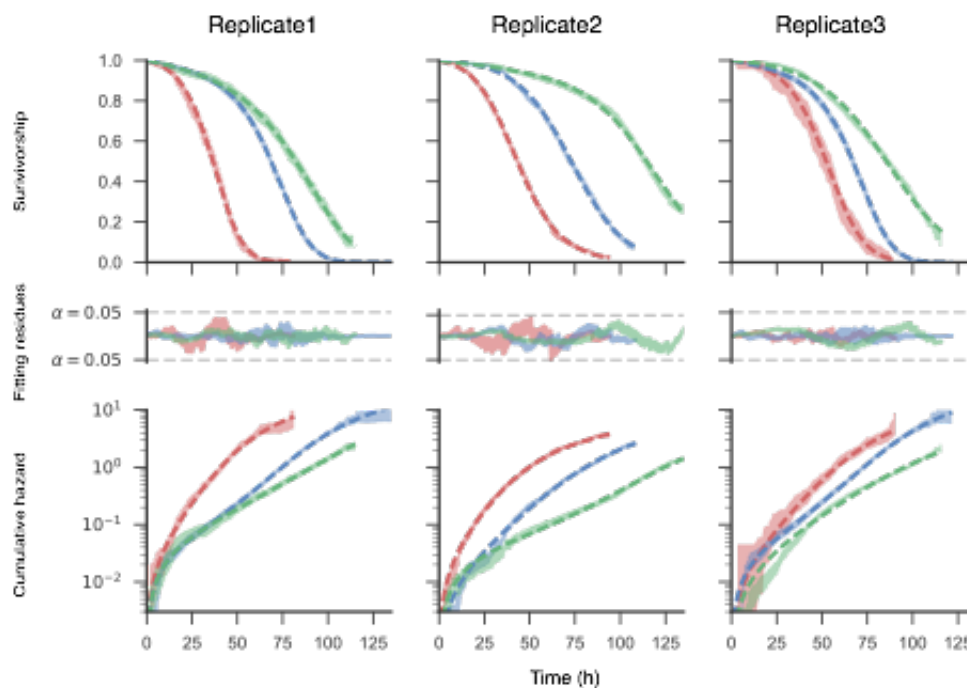

784

785 **Figure S4.** Mortality statistics and goodness-of-fit of 3 independent experimental replicates

786 for each of the 3 strains in Fig. 2. Each column corresponds to each of the 3 experimental

787 replicates, while each row corresponds to a different mortality statistics: top, Survivorship;

788 middle, fitting residues; bottom, cumulative hazards. The cumulative hazards are plotted in

789 log scale so that exponential regimes described by the Gompertz law can be visualised as

790 straight lines. Statistics of the 3 strains are plotted using the same colour code in Fig. 2: blue,

791 *wildtype*; green,  $\Delta rrsB$ ; red,  $\Delta rpoS$ . Coloured dashed lines in all panels are the most likely

792 Gamma-Gompertz-Makeham model, assessed by AIC. Coloured bands in the top and bottom

793 panels are the 95% CI of the Kaplan-Meier (survivorship) and Nelson-Aalen (cumulative

794 hazard) estimators respectively. The fitting residues are the modified Kolmogorov-Smirnov

795 statistic  $Y(t)$  whose extrema can be used to test the goodness-of-fit of the model in the top

796 and bottom panels. Black dashed lines in the middle panels indicate the 0.05 significance

797 level for  $\sup\{|Y(t)|\}$  ( $H_0$ : model fits the data).

798

Available resources

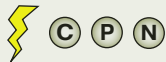

“Feast”

Reproduction

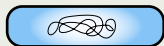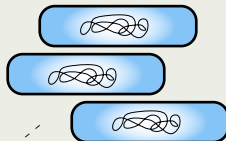

Death

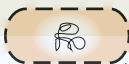

Dispersal

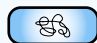

Colonisation

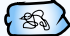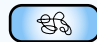

“Famine”

Senescence

Dissipated resources

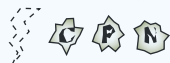

Physiological processes

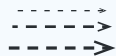

Stochastic events

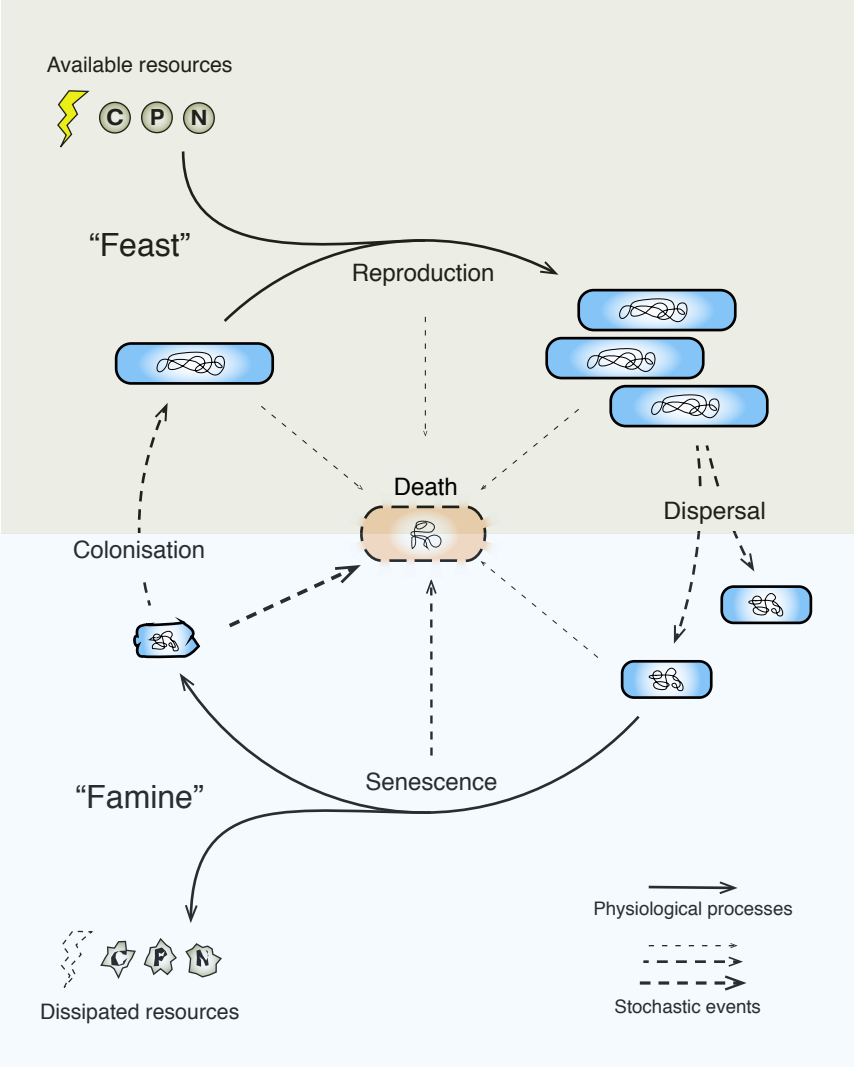

a

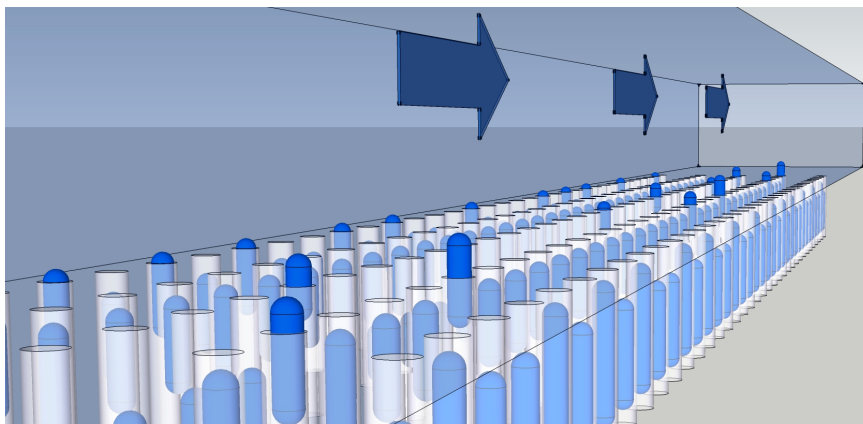

b

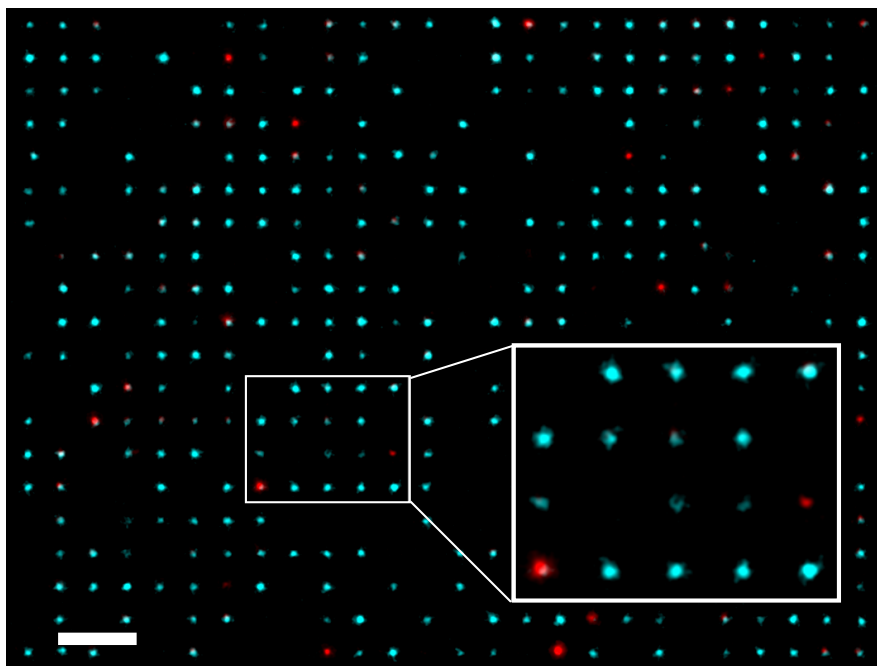

c

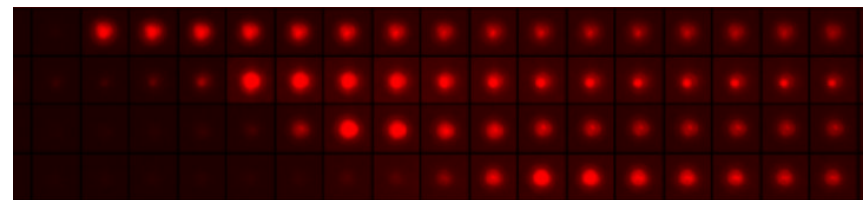

d

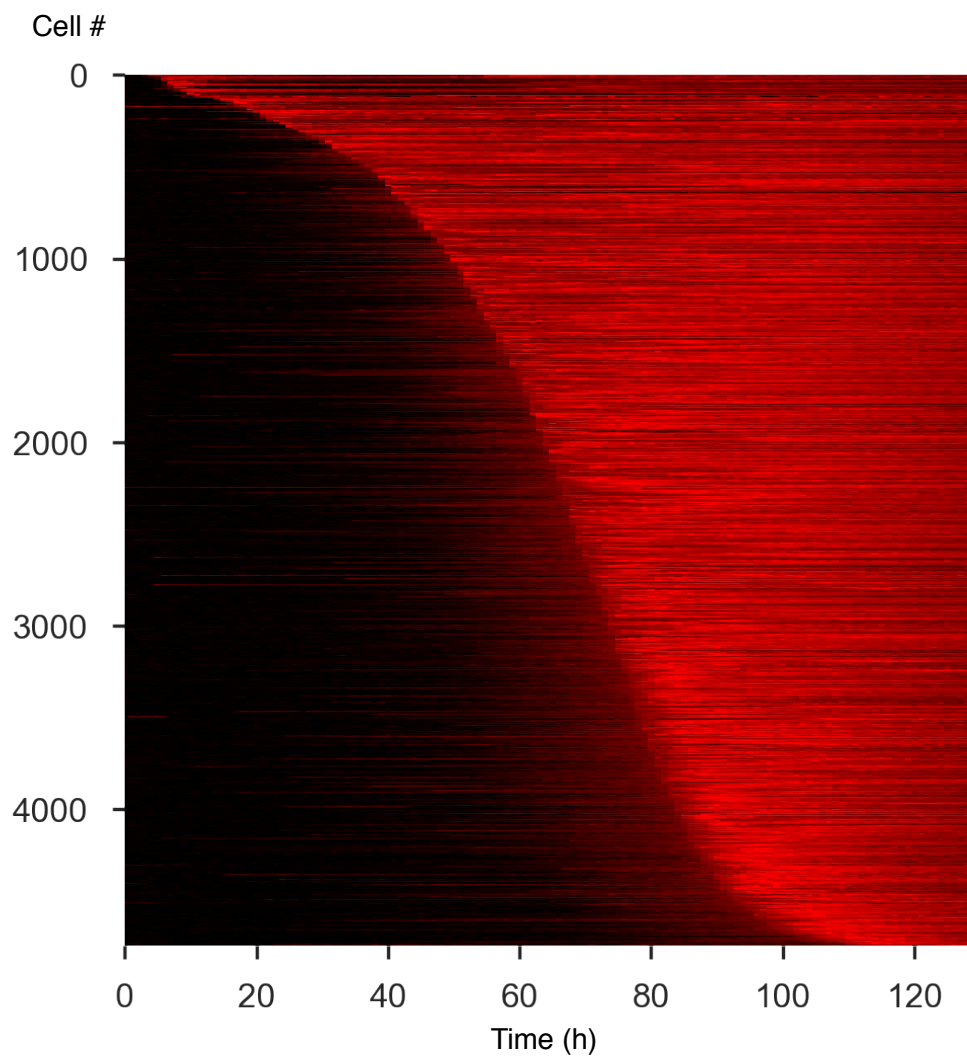

**a**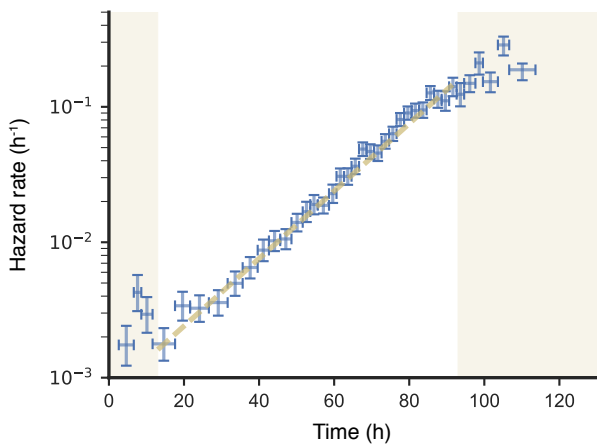**b**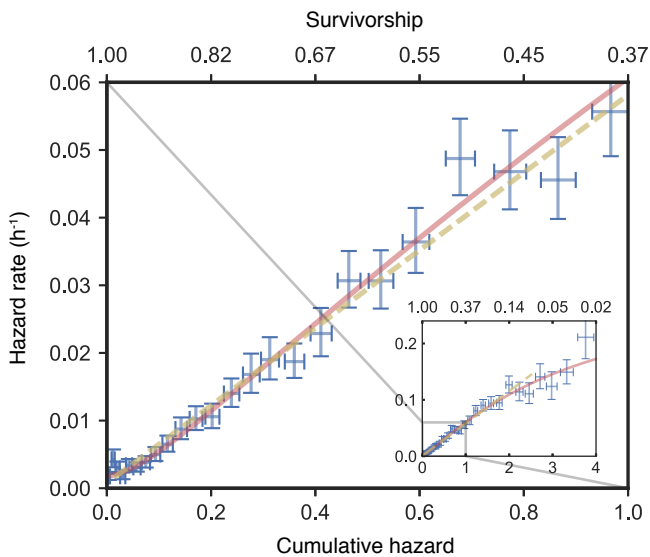

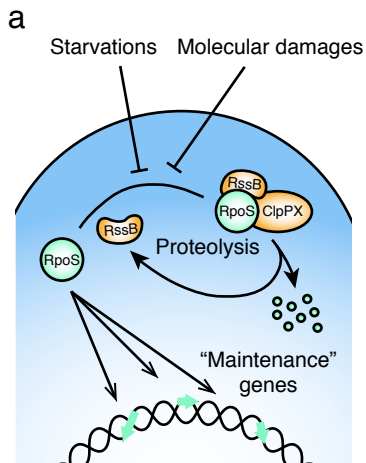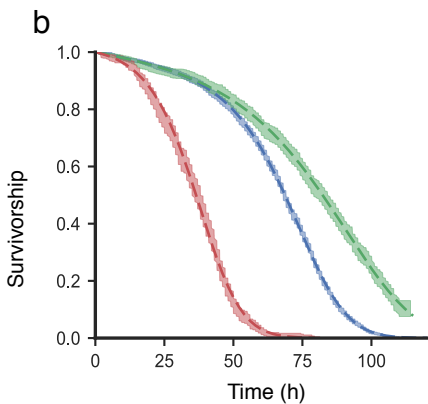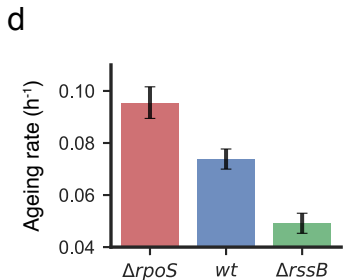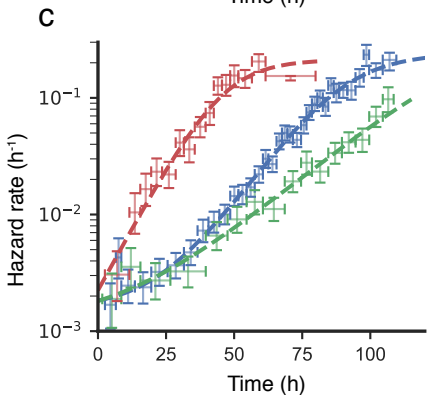

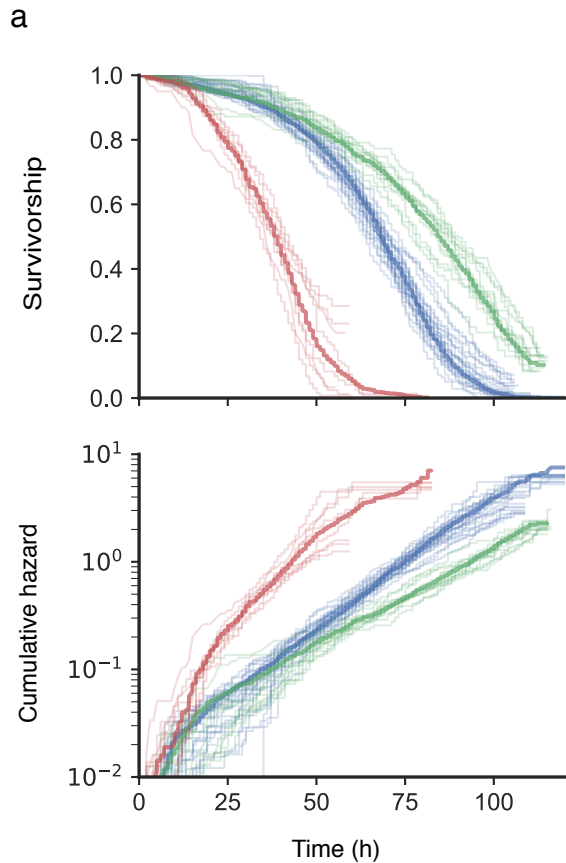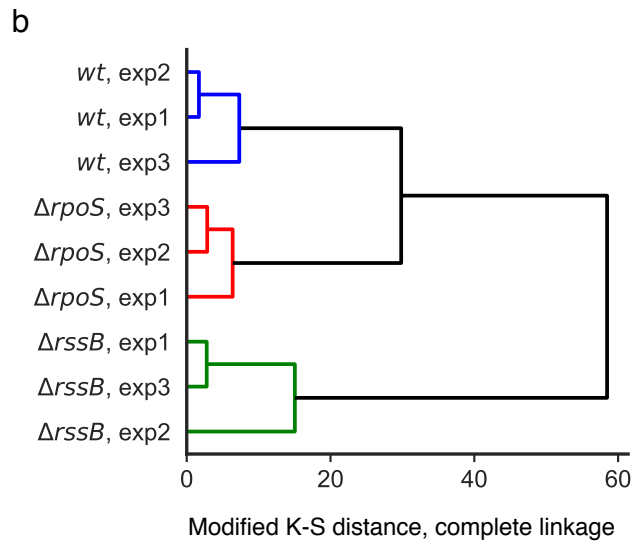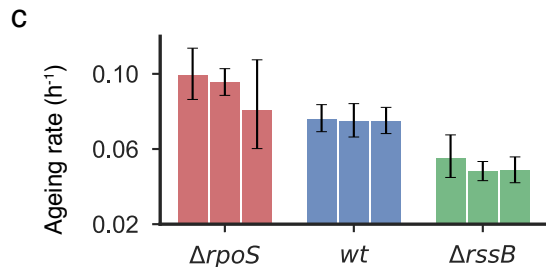

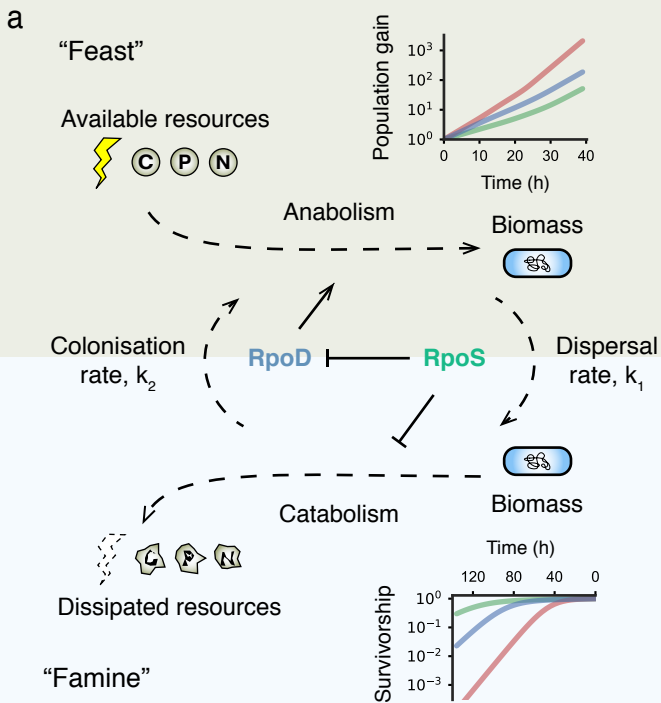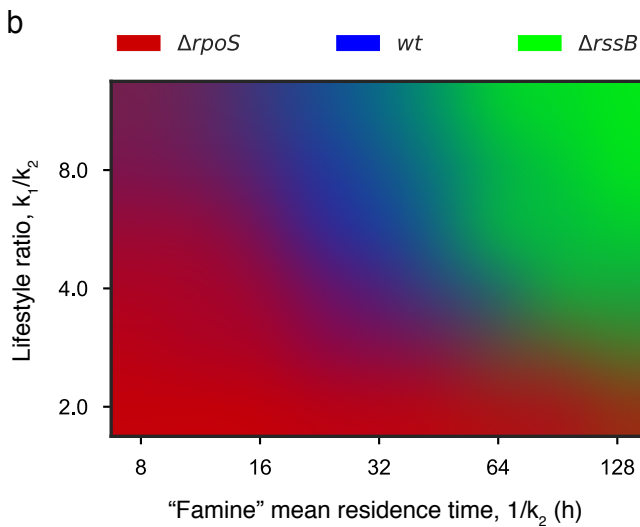

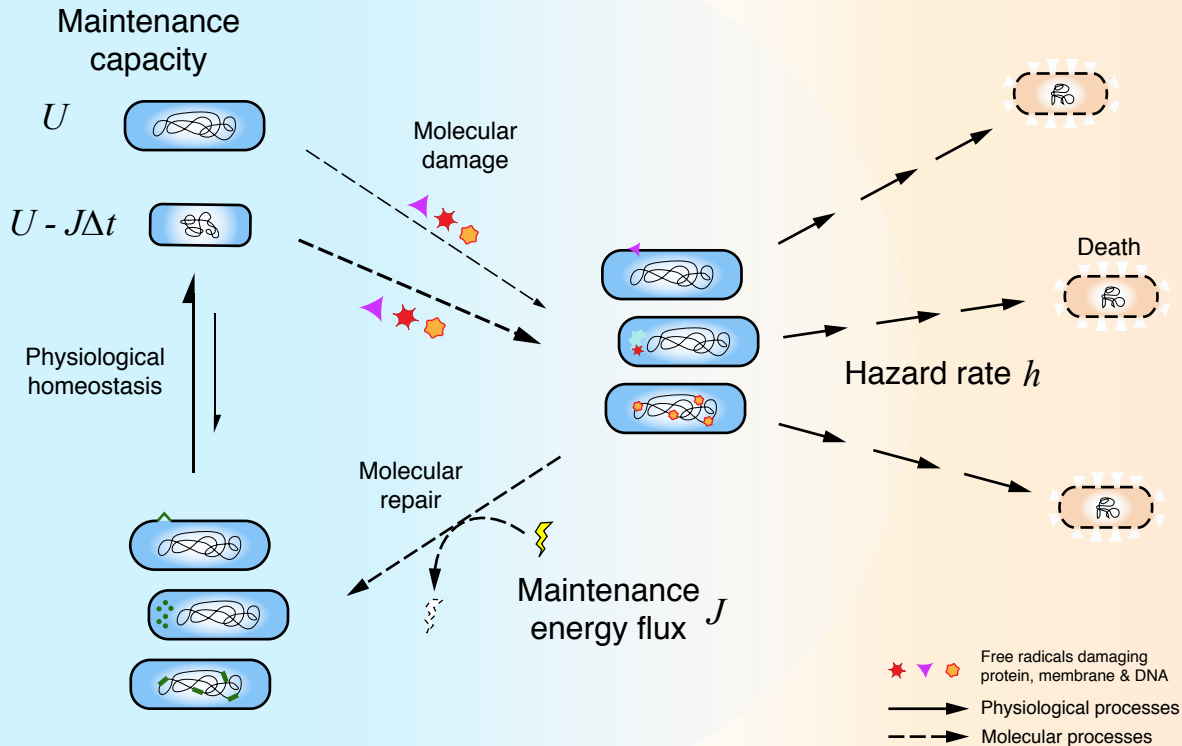



**a**

1 Spin-coating of photo-resist

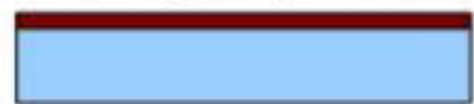

2 UV lithography

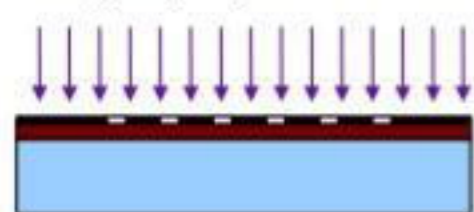

3 Development

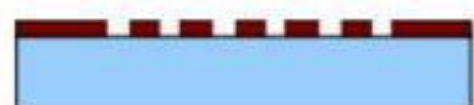

4 Metal deposition (Ni)

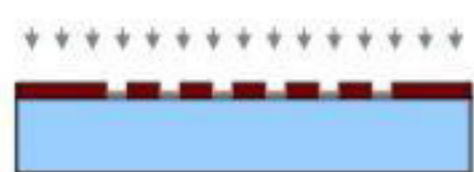

5 Lift-off of photo-resist

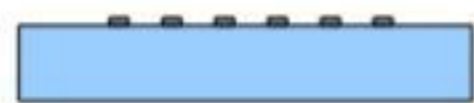

6 Reactive ion etching

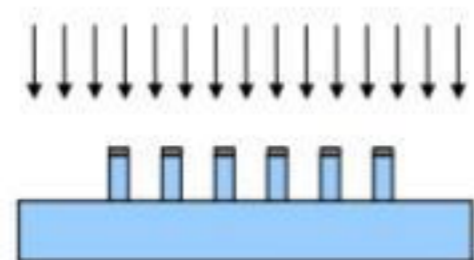

7 Cleaning the metal layer

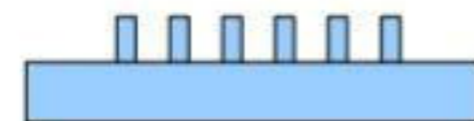**b**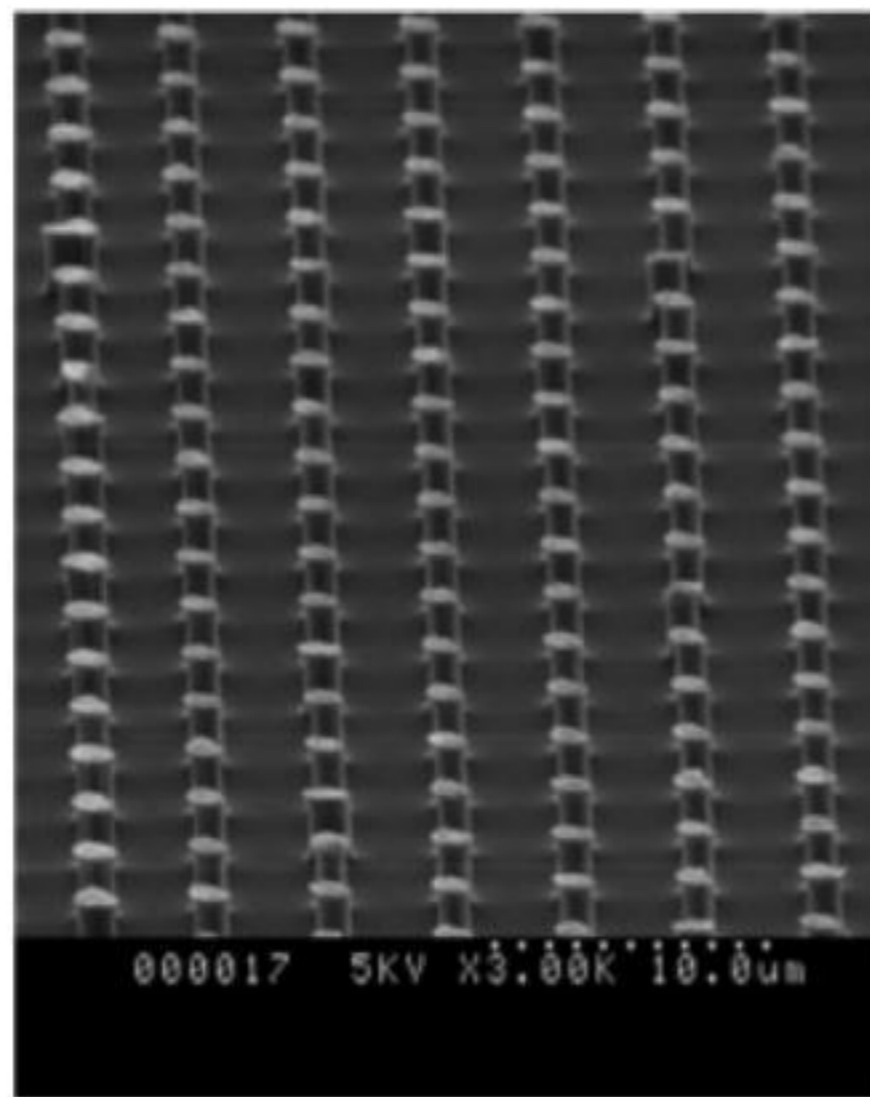**c**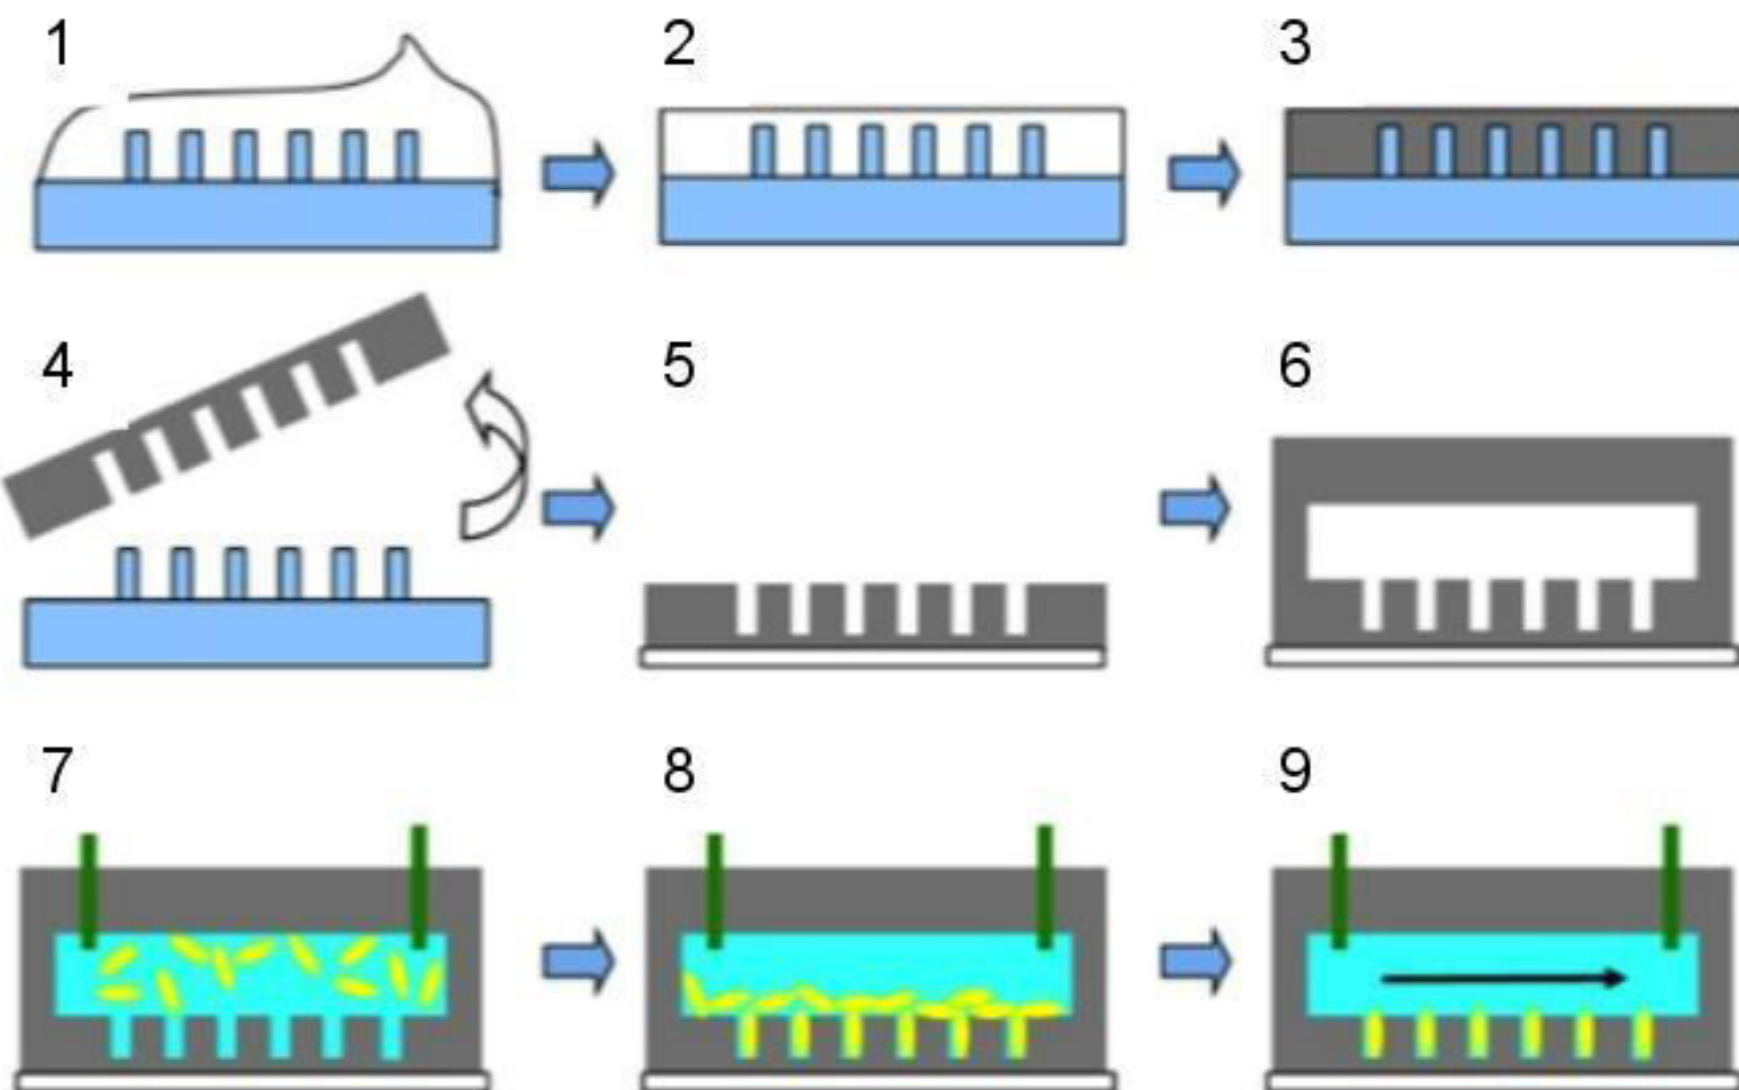

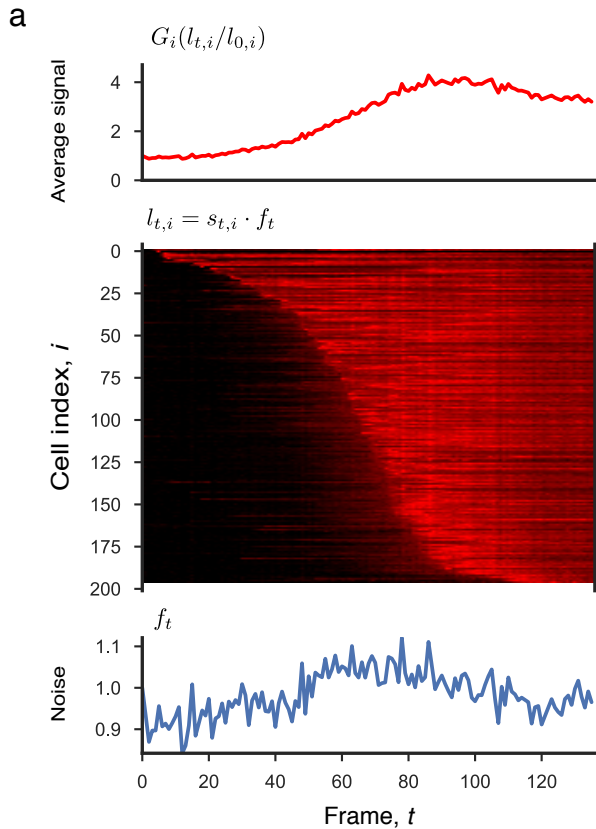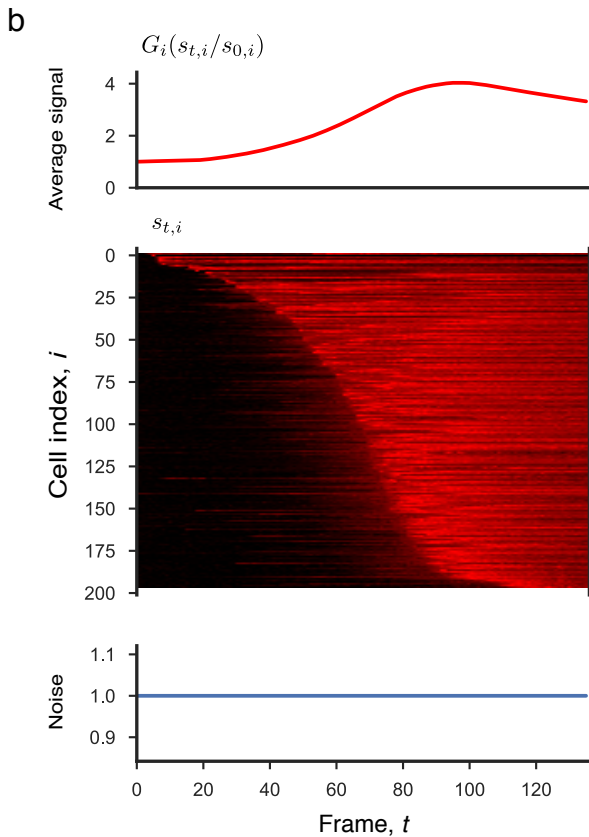

**a**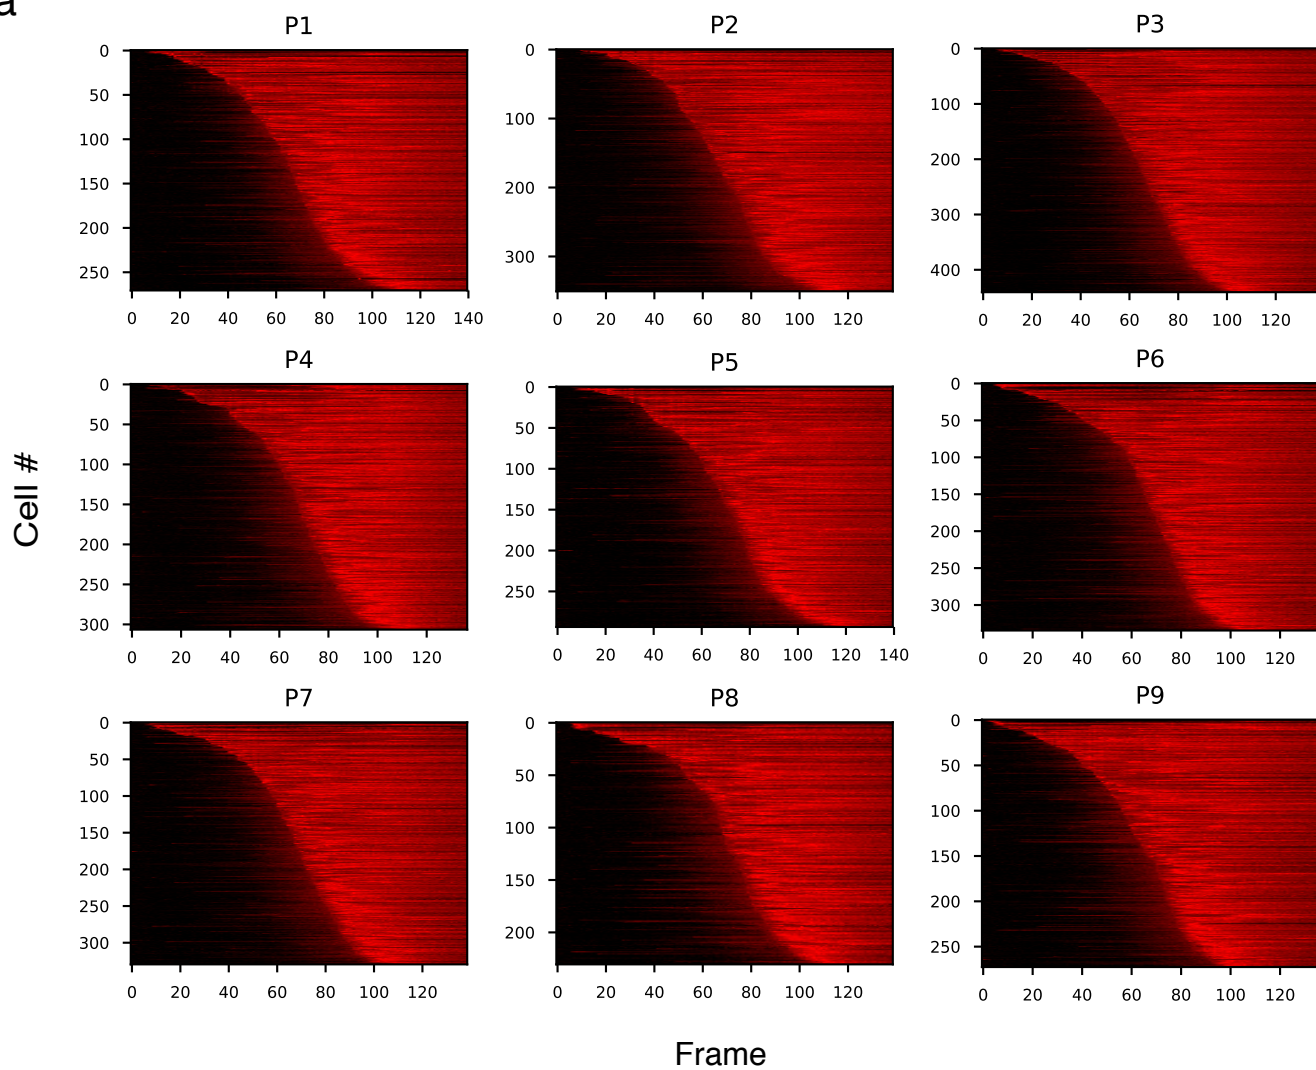**b**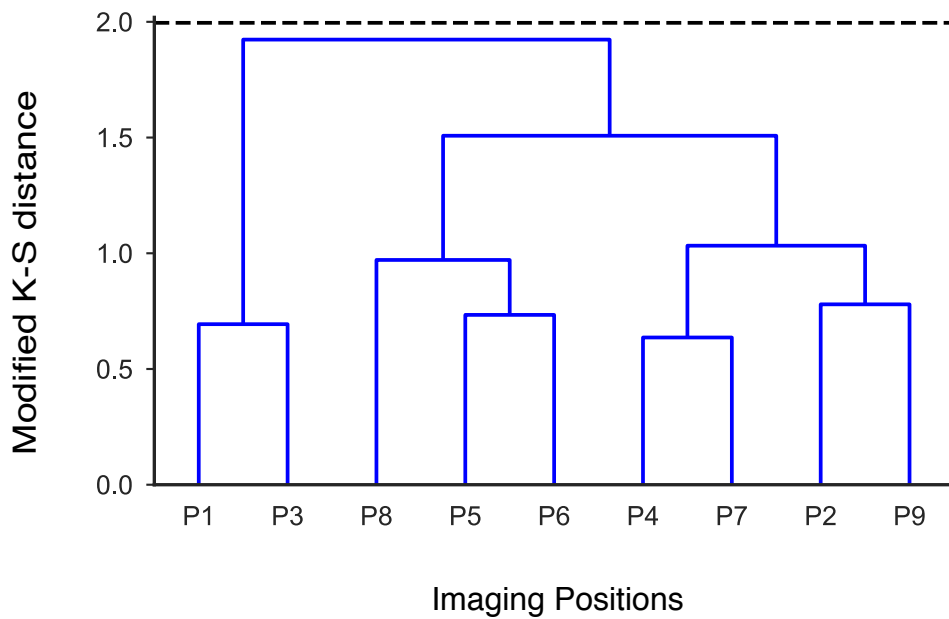

Replicate1

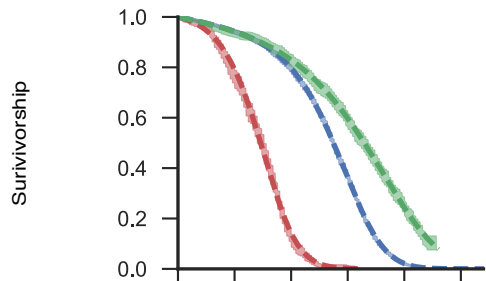

Replicate2

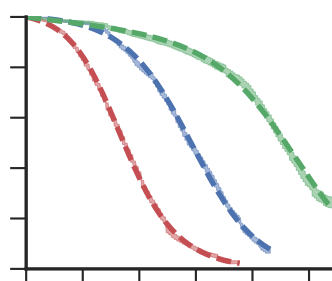

Replicate3

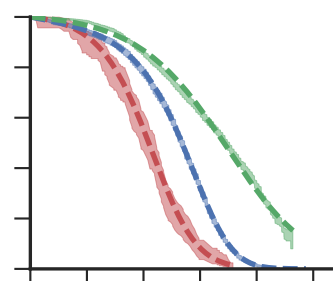

Fitting residues

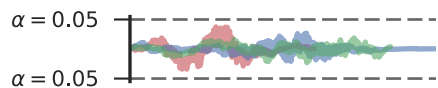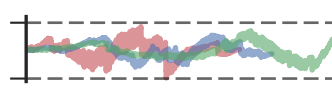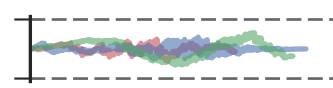

Cumulative hazard

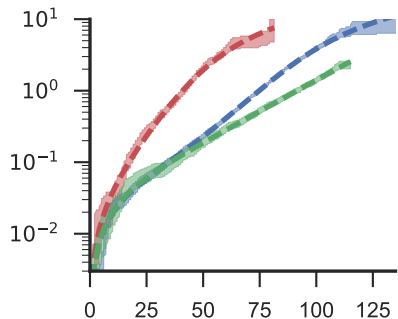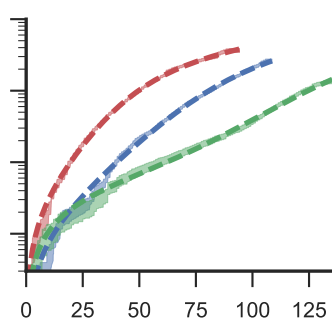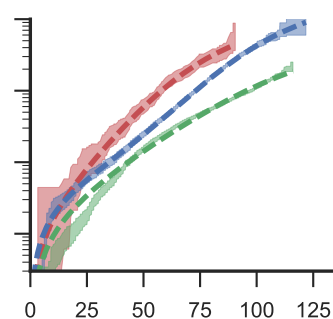

Time (h)
